# Supplementary material
Source: publisher figshare collection journal article supplement (https://gsajournals.figshare.com/ndownloader/files/28832298)
Supplement: Supplementary file 1 [file 28832298]

## Sheet: alignment vs bread wheat genome
Genome-wide association study for morphological, phenological, quality and yield traits in einkorn (Triticum monococcum L. subsp. monococcum)
Andrea Volante1*, Delfina Barabaschi†,2, Rosanna Marino‡, Andrea Brandolini§
*Council for Agricultural Research and Economics - Research Centre for Cereal and Industrial Crops. E-mail: andrea.volante@crea.gov.it. ORCID: 0000-0002-0463-5375
†Council for Agricultural Research and Economics – Research Centre for Genomics and Bioinformatics. E-mail: delfina.barabaschi@crea.gov.it. ORCID: 0000-0002-1107-0210
‡Council for Agricultural Research and Economics – Research Centre for Animal Production and Aquaculture. E-mail: rosanna.marino@crea.gov.it. ORCID: 0000-0002-5868-6696
§Council for Agricultural Research and Economics – Research Centre for Animal Production and Aquaculture. E-mail: andrea.brandolini@crea.gov.it. ORCID: 0000-0002-4552-4081
1 Present Address: CREA Research Centre for Vegetable and Ornamental Crops, Corso Inglesi 508, 18038 Sanremo, IM, Italy
* Corresponding author
Table S2. Physical position on bread wheat genome (IWGSC RefSeq V1.0) assigned to DArT markers of Triticum monococcum												*Marino et al., 2018
								position on genetic mp*
Marker	Chr	Score	Identities	Percentage	Expect	Start	End	Chr	cM
sil_1091952	1	120	68/69	99	1e-25	590554935	590554867
sil_3940413	1	125	69/69	100	3e-27	589820803	589820871					marker number on physical map
sil_5010351	1	116	67/69	97	1e-24	589703289	589703221				Chr
sil_1124920	1	125	69/69	100	3e-27	589475153	589475221				1	206
sil_5003143	1	118	67/68	99	4e-25	586600957	586601024				2_up and down	386
sil_2301074	1	125	69/69	100	3e-27	584961270	584961202				3	296
sil_2262791	1	116	67/69	97	1e-24	584676800	584676868				4_up and down	133
sil_1057186	1	125	69/69	100	3e-27	584598779	584598711				5	342
sil_1163488	1	116	67/69	97	1e-24	584413224	584413156				6	315
sil_1266836	1	125	69/69	100	3e-27	582257553	582257485				7	359
sil_2275401	1	125	69/69	100	3e-27	582243374	582243306					2037
sil_2293817	1	125	69/69	100	3e-27	581936321	581936253
SNP_1239222	1	125	69/69	100	3e-27	579863782	579863714
SNP_1080223	1	125	69/69	100	3e-27	579862569	579862637	1	14.88
sil_1207027	1	125	69/69	100	3e-27	577709533	577709465
sil_1236534	1	125	69/69	100	3e-27	577574006	577573938
SNP_1013123	1	125	69/69	100	3e-27	574644381	574644313
SNP_986660	1	125	69/69	100	3e-27	574359697	574359765
SNP_1090646	1	125	69/69	100	3e-27	574331991	574331923
sil_2256997	1	116	67/69	97	1e-24	574235319	574235251
sil_1221051	1	125	69/69	100	3e-27	574235316	574235384
sil_4994089	1	116	67/69	97	1e-24	574191049	574190981
sil_992228	1	116	67/69	97	1e-24	573206568	573206500
sil_1106982	1	125	69/69	100	3e-27	568573535	568573603
SNP_100018797	1	120	68/69	99	1e-25	568008907	568008975
sil_2263451	1	125	69/69	100	3e-27	567987926	567987994
sil_1218444	1	125	69/69	100	3e-27	566163941	566164009
sil_4996134	1	125	69/69	100	3e-27	566013860	566013792
sil_1119419	1	125	69/69	100	3e-27	565405931	565405999
sil_2262660	1	125	69/69	100	3e-27	565401957	565401889
SNP_100017222	1	116	67/69	97	1e-24	565401954	565402022
sil_1699284	1	125	69/69	100	3e-27	563272704	563272772
sil_1008163	1	120	68/69	99	1e-25	562902682	562902750
sil_3571893	1	113	67/69	97	2e-23	561491436	561491503
sil_1092394	1	125	69/69	100	3e-27	561487901	561487969
sil_1009097	1	125	69/69	100	3e-27	561060092	561060024
sil_1100056	1	125	69/69	100	3e-27	560878129	560878061
SNP_100005162	1	120	68/69	99	1e-25	557116928	557116996
SNP_1122739	1	125	69/69	100	3e-27	554889354	554889286
sil_5009767	1	114	66/68	97	5e-24	551947394	551947327
SNP_4261105	1	125	69/69	100	3e-27	551427141	551427209	1	46.14
SNP_1024054	1	125	69/69	100	3e-27	550110291	550110223
sil_1089207	1	125	69/69	100	3e-27	549852889	549852957
sil_1089724	1	125	69/69	100	3e-27	549851141	549851209
sil_2288962	1	125	69/69	100	3e-27	549422876	549422944
sil_1302538	1	123	68/68	100	1e-26	549301751	549301684
sil_3571632	1	123	68/68	100	1e-26	549296895	549296962
sil_1057454	1	116	67/69	97	1e-24	549283004	549282936
sil_1092344	1	125	69/69	100	3e-27	549062630	549062562
sil_1090129	1	125	69/69	100	3e-27	549062627	549062695
SNP_2276278	1	125	69/69	100	3e-27	548916185	548916253
sil_1204074	1	125	69/69	100	3e-27	548777371	548777303
sil_2289064	1	125	69/69	100	3e-27	547863846	547863778
SNP_100011041	1	116	67/69	97	1e-24	546799373	546799441
sil_1216164	1	120	68/69	99	1e-25	546799320	546799252
sil_4999109	1	116	67/69	97	1e-24	546799320	546799252
sil_4999299	1	116	67/69	97	1e-24	546799320	546799252
SNP_1048250	1	125	69/69	100	3e-27	546516253	546516321
SNP_100023238	1	116	67/69	97	1e-24	545907895	545907827
SNP_3574515	1	114	66/68	97	5e-24	544583207	544583140
sil_4537905	1	118	67/68	99	4e-25	544378269	544378202
sil_4538798	1	118	67/68	99	4e-25	544378269	544378202
sil_1034084	1	125	69/69	100	3e-27	544312368	544312300
SNP_2298023	1	123	68/68	100	1e-26	541991784	541991851
SNP_1092591	1	125	69/69	100	3e-27	540644617	540644549	1	57.84
sil_1119780	1	125	69/69	100	3e-27	539883260	539883192
sil_1076473	1	125	69/69	100	3e-27	539596618	539596550
SNP_1066673	1	125	69/69	100	3e-27	537970472	537970540
SNP_100057721	1	120	68/69	99	1e-25	537093899	537093967
SNP_993221	1	116	67/69	97	1e-24	536652626	536652694
SNP_1095870	1	125	69/69	100	3e-27	535446672	535446740
sil_1046301	1	125	69/69	100	3e-27	534051609	534051677
sil_1670478	1	116	67/69	97	1e-24	533149145	533149213
sil_5006803	1	114	66/68	97	5e-24	532810779	532810712
SNP_1073719	1	125	69/69	100	3e-27	532745139	532745207	1	67.96
SNP_986586	1	125	69/69	100	3e-27	532670342	532670274	1	67.96
sil_1054902	1	120	68/69	99	1e-25	531926723	531926655
SNP_2290270	1	125	69/69	100	3e-27	530809593	530809525
SNP_1037441	1	125	69/69	100	3e-27	530809590	530809658
SNP_2282530	1	125	69/69	100	3e-27	530258954	530258886
SNP_100007744	1	123	68/68	100	1e-26	530178334	530178267
SNP_100015108	1	118	67/68	99	4e-25	521990170	521990237
sil_4395680	1	125	69/69	100	3e-27	518772668	518772600
SNP_100003565	1	116	67/69	97	1e-24	516586573	516586505
SNP_1065958	1	118	67/68	99	4e-25	512886227	512886160
sil_1062638	1	125	69/69	100	3e-27	512496605	512496673
SNP_1863652	1	125	69/69	100	3e-27	511410499	511410431	1	78.25
sil_4999384	1	116	67/69	97	1e-24	511148541	511148609
SNP_1696689	1	125	69/69	100	3e-27	510829921	510829853	1	79.41
sil_4995692	1	116	67/69	97	1e-24	510822973	510822905
sil_3573005	1	116	67/69	97	1e-24	510328142	510328074
sil_1146411	1	120	68/69	99	1e-25	508047272	508047340
sil_1230905	1	125	69/69	100	3e-27	499864205	499864137
SNP_2277067	1	125	69/69	100	3e-27	496122929	496122861
sil_3572885	1	116	67/69	97	1e-24	493935624	493935692
SNP_2243185	1	125	69/69	100	3e-27	492800956	492800888
SNP_1242326	1	125	69/69	100	3e-27	492800953	492801021
SNP_1042992	1	125	69/69	100	3e-27	490420556	490420624
SNP_989876	1	120	68/69	99	1e-25	484999151	484999083
SNP_100017762	1	123	68/68	100	1e-26	482780061	482779994
SNP_2288980	1	125	69/69	100	3e-27	480935977	480935909
sil_1064932	1	125	69/69	100	3e-27	480805451	480805519
SNP_100010183	1	114	66/68	97	5e-24	475709922	475709855
sil_5010151	1	125	69/69	100	3e-27	474420932	474421000
SNP_100002541	1	116	67/69	97	1e-24	471729427	471729359
sil_1020335	1	125	69/69	100	3e-27	465511610	465511542
SNP_1089518	1	125	69/69	100	3e-27	465457963	465458031	1	97.76
SNP_2258338	1	125	69/69	100	3e-27	462698997	462699065
SNP_2256752	1	125	69/69	100	3e-27	462617106	462617174
sil_992487	1	125	69/69	100	3e-27	453532779	453532711
SNP_3574272	1	113	67/69	97	2e-23	452859386	452859319
SNP_100002184	1	116	67/69	97	1e-24	443628672	443628604
sil_2276183	1	118	67/68	99	4e-25	423932005	423931938
sil_5006003	1	116	67/69	97	1e-24	408284423	408284355
sil_1008166	1	125	69/69	100	3e-27	405871833	405871901
SNP_2252437	1	125	69/69	100	3e-27	397083178	397083110	1	115.5
sil_5001332	1	116	67/69	97	1e-24	396455931	396455863
SNP_100003939	1	116	67/69	97	1e-24	396455931	396455863
sil_1217762	1	120	68/69	99	1e-25	394444689	394444757
sil_1054469	1	116	67/69	97	1e-24	387198141	387198209
SNP_100011103	1	120	68/69	99	1e-25	381798469	381798537
sil_1089688	1	125	69/69	100	3e-27	380939699	380939631
sil_1039412	1	125	69/69	100	3e-27	379855852	379855920
sil_2275320	1	125	69/69	100	3e-27	377426568	377426636
SNP_1087379	1	120	68/69	99	1e-25	374570662	374570730
sil_3573113	1	116	67/69	97	1e-24	369738040	369737972
sil_1073129	1	125	69/69	100	3e-27	358922227	358922295
sil_1218472	1	125	69/69	100	3e-27	358468771	358468839
sil_3573128	1	116	67/69	97	1e-24	357810073	357810005
sil_5001879	1	120	68/69	99	1e-25	357809115	357809183
SNP_100006432	1	116	67/69	97	1e-24	356476986	356477054
SNP_2275173	1	125	69/69	100	3e-27	346466607	346466675
sil_3943788	1	125	69/69	100	3e-27	344290598	344290666
SNP_100004390	1	120	68/69	99	1e-25	321412128	321412196
sil_5005685	1	116	67/69	97	1e-24	310266863	310266795
SNP_2306600	1	125	69/69	100	3e-27	305335646	305335714
sil_5010374	1	120	68/69	99	1e-25	297709370	297709302
sil_5004032	1	116	67/69	97	1e-24	290406874	290406942
SNP_3574869	1	114	66/68	97	5e-24	287785457	287785390
sil_4996655	1	125	69/69	100	3e-27	281260591	281260659
sil_983135	1	125	69/69	100	3e-27	272191898	272191830
sil_3575496	1	114	66/68	97	5e-24	266740723	266740656
SNP_1033420	1	125	69/69	100	3e-27	258871347	258871279
sil_1407595	1	116	67/69	97	1e-24	255045618	255045686
sil_5005611	1	120	68/69	99	1e-25	249772714	249772646
sil_5006378	1	120	68/69	99	1e-25	203515264	203515196
SNP_2247755	1	125	69/69	100	3e-27	186212553	186212485
SNP_100017192	1	116	67/69	97	1e-24	168907305	168907373
sil_5005829	1	123	68/68	100	1e-26	156538803	156538870
sil_1279614	1	123	68/68	100	1e-26	137799567	137799500
sil_1125744	1	125	69/69	100	3e-27	137212718	137212650
sil_3573332	1	118	67/68	99	4e-25	95938760	95938827
sil_4994462	1	116	67/69	97	1e-24	94870817	94870749
sil_1058050	1	125	69/69	100	3e-27	79300562	79300494
sil_1056480	1	116	67/69	97	1e-24	68994119	68994187
sil_5010431	1	118	67/68	99	4e-25	63911799	63911732
sil_3944829	1	125	69/69	100	3e-27	53508134	53508202
sil_2277328	1	120	68/69	99	1e-25	50840883	50840951
sil_1062027	1	125	69/69	100	3e-27	41906020	41906088
sil_1119839	1	116	67/69	97	1e-24	39183242	39183310
sil_1071569	1	125	69/69	100	3e-27	38866212	38866144
SNP_1159766	1	125	69/69	100	3e-27	37507449	37507517	1	139.38
sil_3572722	1	116	67/69	97	1e-24	34849889	34849957
SNP_1103151	1	125	69/69	100	3e-27	30294497	30294565	1	145.26
sil_4999192	1	120	68/69	99	1e-25	29790678	29790746
SNP_1326684	1	125	69/69	100	3e-27	23420939	23420871
SNP_2277639	1	125	69/69	100	3e-27	22535056	22534988
sil_1698138	1	114	66/68	97	5e-24	22047042	22047109
sil_1089045	1	125	69/69	100	3e-27	22039194	22039262
SNP_3534358	1	116	67/69	97	1e-24	21638580	21638648
sil_4999491	1	111	66/68	97	6e-23	20973790	20973723
sil_1081222	1	125	69/69	100	3e-27	20918984	20918916
sil_992286	1	123	68/68	100	1e-26	20788617	20788550
SNP_2258746	1	125	69/69	100	3e-27	20237418	20237486
SNP_1151033	1	125	69/69	100	3e-27	17008985	17009053
sil_1054654	1	125	69/69	100	3e-27	16933269	16933337
SNP_1052695	1	120	68/69	99	1e-25	16417326	16417394	1	166.03
sil_1020586	1	116	67/69	97	1e-24	15516892	15516824
sil_3939338	1	125	69/69	100	3e-27	14840484	14840416
SNP_1070756	1	125	69/69	100	3e-27	14161161	14161093
SNP_1090405	1	125	69/69	100	3e-27	11718358	11718426
sil_992137	1	125	69/69	100	3e-27	10210912	10210844
sil_4996962	1	116	68/69	99	1e-24	10174971	10175038
sil_4406449	1	116	67/69	97	1e-24	10135840	10135908
sil_4411795	1	116	67/69	97	1e-24	10135840	10135908
sil_1108323	1	125	69/69	100	3e-27	10127837	10127905
sil_3570342	1	120	68/69	99	1e-25	9927667	9927735
sil_1110722	1	125	69/69	100	3e-27	9698097	9698165
sil_1293074	1	120	68/69	99	1e-25	9600601	9600669
sil_4994614	1	125	69/69	100	3e-27	9554726	9554794
sil_3573277	1	125	69/69	100	3e-27	9478182	9478114
sil_1116382	1	125	69/69	100	3e-27	9341097	9341165
SNP_1054423	1	125	69/69	100	3e-27	9163401	9163333	1	173.82
sil_5003065	1	125	69/69	100	3e-27	8132403	8132471
sil_1107257	1	125	69/69	100	3e-27	8131381	8131449
sil_1119512	1	114	66/68	97	5e-24	7652856	7652789
sil_1053098	1	125	69/69	100	3e-27	5491230	5491162
sil_3030304	1	125	69/69	100	3e-27	4811677	4811609
sil_1224449	1	125	69/69	100	3e-27	3613585	3613653
sil_5001806	1	120	68/69	99	1e-25	3494327	3494259
sil_3573205	1	125	69/69	100	3e-27	2856626	2856558
sil_1237233	1	125	69/69	100	3e-27	2472749	2472681
sil_1860594	1	125	69/69	100	3e-27	2281811	2281743
sil_4409943	1	116	67/69	97	1e-24	1846753	1846821
sil_1723678	1	116	67/69	97	1e-24	1674029	1674097
sil_1092630	1	125	69/69	100	3e-27	1673894	1673826
SNP_1020730	2_up	125	69/69	100	3e-27	500678	500610
sil_1262031	2_up	120	68/69	99	1e-25	1284505	1284573
SNP_1107144	2_up	125	69/69	100	3e-27	1686025	1685957	2	0
sil_1020490	2_up	120	68/69	99	1e-25	2727553	2727485
sil_4996992	2_up	120	68/69	99	1e-25	2731273	2731341
sil_1110007	2_up	116	67/69	97	1e-24	2740675	2740607
sil_1238501	2_up	125	69/69	100	3e-27	2784426	2784358
sil_1286646	2_up	125	69/69	100	3e-27	2810466	2810534
sil_2250418	2_up	125	69/69	100	3e-27	3857208	3857140
sil_1235929	2_up	125	69/69	100	3e-27	3975403	3975335
sil_1129613	2_up	120	68/69	99	1e-25	4109576	4109508
sil_1259473	2_up	116	67/69	97	1e-24	4160401	4160333
sil_1021520	2_up	120	68/69	99	1e-25	4356820	4356888
sil_2276157	2_up	125	69/69	100	3e-27	4768744	4768676
sil_1199266	2_up	125	69/69	100	3e-27	5034160	5034092
sil_1092690	2_up	120	68/69	99	1e-25	5693021	5692953
sil_1094127	2_up	120	68/69	99	1e-25	5707360	5707292
sil_5007431	2_up	118	67/68	99	4e-25	6274074	6274141
sil_2281903	2_up	125	69/69	100	3e-27	7443442	7443510
sil_986858	2_up	120	68/69	99	1e-25	8148880	8148948
sil_1860790	2_up	116	67/69	97	1e-24	10904209	10904141
sil_1048620	2_up	116	67/69	97	1e-24	11543941	11544009
SNP_1025662	2_up	118	67/68	99	4e-25	13252205	13252272
sil_4008032	2_up	116	67/69	97	1e-24	13253270	13253338
sil_998804	2_up	120	68/69	99	1e-25	13253270	13253338
SNP_3946903	2_up	125	69/69	100	3e-27	13438054	13438122	2	16.86
SNP_2245524	2_up	125	69/69	100	3e-27	15031219	15031287	2	21.61
sil_1092886	2_up	125	69/69	100	3e-27	16016690	16016622
sil_1119700	2_up	118	67/68	99	4e-25	20245219	20245152
sil_5001814	2_up	113	67/69	97	2e-23	21282360	21282426
sil_1084333	2_up	116	67/69	97	1e-24	21465723	21465791
sil_1860347	2_up	114	66/68	97	5e-24	21465726	21465659
sil_5009665	2_up	114	66/68	97	5e-24	21465726	21465659
sil_1101880	2_up	125	69/69	100	3e-27	22022457	22022525
sil_1764551	2_up	120	68/69	99	1e-25	22126569	22126637
sil_4997170	2_up	116	67/69	97	1e-24	22164144	22164076
sil_1114094	2_up	125	69/69	100	3e-27	22190123	22190055
sil_4997226	2_up	114	66/68	97	5e-24	23464928	23464861
SNP_1087756	2_up	125	69/69	100	3e-27	23828965	23828897	2	35.48
sil_1115524	2_up	116	67/69	97	1e-24	23828965	23828897
sil_4997168	2_up	116	67/69	97	1e-24	23892245	23892177
sil_988170	2_up	125	69/69	100	3e-27	24214165	24214233
sil_1124948	2_up	125	69/69	100	3e-27	26794017	26794085
SNP_1194094	2_up	125	69/69	100	3e-27	27134255	27134323
sil_1055111	2_up	125	69/69	100	3e-27	27619517	27619585
sil_2306315	2_up	125	69/69	100	3e-27	27722119	27722051
sil_981872	2_up	125	69/69	100	3e-27	27958052	27958120
sil_2306298	2_up	125	69/69	100	3e-27	29874184	29874252
SNP_100013583	2_up	120	68/69	99	1e-25	30851182	30851114
sil_1277486	2_up	120	68/69	99	1e-25	32155654	32155586
sil_4537735	2_up	120	68/69	99	1e-25	32266036	32266104
sil_2293563	2_up	123	68/68	100	1e-26	32876046	32875979
SNP_3574803	2_up	116	67/69	97	1e-24	32984095	32984027	2	45.31
sil_2257141	2_up	120	68/69	99	1e-25	33335244	33335312
sil_5002436	2_up	116	67/69	97	1e-24	33335244	33335312
sil_2258664	2_up	120	68/69	99	1e-25	33343837	33343905
sil_977634	2_up	125	69/69	100	3e-27	35461242	35461310
SNP_2248034	2_up	125	69/69	100	3e-27	35976520	35976452	2	48.41
SNP_983272	2_up	125	69/69	100	3e-27	36038239	36038171	2	48.41
SNP_2249228	2_up	125	69/69	100	3e-27	36202153	36202221
sil_2303384	2_up	125	69/69	100	3e-27	36417199	36417131
sil_1722172	2_up	125	69/69	100	3e-27	36813166	36813098
sil_1104591	2_up	125	69/69	100	3e-27	38516843	38516775
sil_992185	2_up	125	69/69	100	3e-27	38914939	38915007
sil_1089226	2_up	125	69/69	100	3e-27	38981850	38981918
sil_1401166	2_up	125	69/69	100	3e-27	38982022	38981954
SNP_3575270	2_up	120	68/69	99	1e-25	39122862	39122794
SNP_1056226	2_up	125	69/69	100	3e-27	39901740	39901672
sil_1288725	2_up	125	69/69	100	3e-27	40556089	40556021
sil_1091531	2_up	125	69/69	100	3e-27	42157089	42157021
sil_1018775	2_up	125	69/69	100	3e-27	42193463	42193531
SNP_1094303	2_up	123	68/68	100	1e-26	43430237	43430170	2	57.86
SNP_1173477	2_up	125	69/69	100	3e-27	44091539	44091607
sil_5003119	2_up	125	69/69	100	3e-27	44177759	44177827
sil_1127702	2_up	120	68/69	99	1e-25	44177762	44177694
SNP_1100699	2_up	125	69/69	100	3e-27	45084319	45084387
sil_1070814	2_up	120	68/69	99	1e-25	48490339	48490271
sil_5006073	2_up	116	67/69	97	1e-24	48490339	48490271
sil_1127399	2_up	120	68/69	99	1e-25	49074964	49075032
SNP_2318465	2_up	125	69/69	100	3e-27	49074967	49074899
SNP_1263135	2_up	125	69/69	100	3e-27	49451191	49451259	2	62.46
sil_4996564	2_up	120	68/69	99	1e-25	50074081	50074013
SNP_2275773	2_up	125	69/69	100	3e-27	51004203	51004271
sil_3575574	2_up	120	68/69	99	1e-25	52010152	52010084
SNP_100023090	2_up	116	67/69	97	1e-24	52397779	52397847
sil_1202155	2_up	125	69/69	100	3e-27	52405580	52405512
SNP_2289816	2_up	125	69/69	100	3e-27	52665785	52665853
SNP_1220267	2_up	125	69/69	100	3e-27	54009300	54009368	2	68.26
SNP_1221059	2_up	125	69/69	100	3e-27	54027813	54027745
sil_1071125	2_up	125	69/69	100	3e-27	54630136	54630068
sil_4009736	2_up	125	69/69	100	3e-27	54690610	54690542
SNP_2275170	2_up	125	69/69	100	3e-27	54706072	54706004
sil_2276492	2_up	125	69/69	100	3e-27	54882613	54882545
sil_5003318	2_up	116	67/69	97	1e-24	57538305	57538237
sil_1391401	2_up	125	69/69	100	3e-27	57575772	57575840
sil_2276212	2_up	125	69/69	100	3e-27	58010615	58010683
sil_1069938	2_up	125	69/69	100	3e-27	58548550	58548482
sil_5002092	2_up	113	67/69	97	2e-23	58548550	58548483
sil_3575547	2_up	116	67/69	97	1e-24	58763675	58763743
sil_3957450	2_up	118	67/68	99	4e-25	58905800	58905733
SNP_1284888	2_up	125	69/69	100	3e-27	59125728	59125660
sil_3571868	2_up	116	68/69	99	1e-24	60761725	60761658
sil_4996516	2_up	120	68/69	99	1e-25	60797638	60797706
sil_984447	2_up	125	69/69	100	3e-27	61853343	61853275
sil_1068736	2_up	125	69/69	100	3e-27	62357056	62356988
sil_1107571	2_up	125	69/69	100	3e-27	62719730	62719662
sil_1232596	2_up	125	69/69	100	3e-27	73377075	73377143
sil_2328344	2_up	125	69/69	100	3e-27	75346964	75346896
SNP_1161563	2_up	120	68/69	99	1e-25	75644862	75644930
sil_5007860	2_up	120	68/69	99	1e-25	78263380	78263448
sil_1058403	2_up	125	69/69	100	3e-27	78561742	78561674
SNP_1045828	2_up	125	69/69	100	3e-27	79540267	79540335	2	87.26
sil_1091924	2_up	125	69/69	100	3e-27	80532729	80532661
SNP_1100518	2_up	125	69/69	100	3e-27	80851866	80851934
SNP_3950480	2_up	125	69/69	100	3e-27	88117797	88117865
SNP_100010290	2_up	125	69/69	100	3e-27	90297556	90297488
sil_4994386	2_up	123	68/68	100	1e-26	90742999	90743066
sil_4995918	2_up	116	67/69	97	1e-24	91430677	91430745
SNP_998851	2_up	125	69/69	100	3e-27	94275643	94275711
sil_981399	2_up	116	67/69	97	1e-24	94276266	94276334
sil_1074973	2_up	125	69/69	100	3e-27	98250274	98250206
SNP_1077317	2_up	125	69/69	100	3e-27	100972570	100972638
SNP_1218016	2_up	125	69/69	100	3e-27	101093178	101093246	2	92.97
SNP_2289115	2_up	125	69/69	100	3e-27	102101034	102100966
sil_1140810	2_up	125	69/69	100	3e-27	102405292	102405360
sil_977603	2_up	125	69/69	100	3e-27	104677487	104677419
sil_1166053	2_up	120	68/69	99	1e-25	106799951	106800019
SNP_100032399	2_up	116	67/69	97	1e-24	113830423	113830355
SNP_985906	2_up	125	69/69	100	3e-27	117156478	117156410
sil_2275593	2_up	125	69/69	100	3e-27	120101745	120101677
sil_2277039	2_up	125	69/69	100	3e-27	121586790	121586858
sil_1035330	2_up	125	69/69	100	3e-27	130725733	130725665
sil_5006490	2_up	120	68/69	99	1e-25	133469895	133469963
sil_1074803	2_up	120	68/69	99	1e-25	137232003	137232071
sil_2262912	2_up	120	68/69	99	1e-25	138083856	138083924
sil_1105852	2_up	125	69/69	100	3e-27	138919827	138919895
SNP_2276154	2_up	125	69/69	100	3e-27	141284202	141284134	2	99.45
sil_3572052	2_up	118	67/68	99	4e-25	154551687	154551620
SNP_100017357	2_up	116	67/69	97	1e-24	156682969	156682901
sil_5004215	2_up	114	66/68	97	5e-24	161274384	161274451
sil_1048296	2_up	125	69/69	100	3e-27	161935851	161935783
SNP_1120319	2_up	125	69/69	100	3e-27	187951397	187951329	2	106.19
sil_995318	2_up	120	68/69	99	1e-25	197553978	197553910
sil_5004682	2_up	116	67/69	97	1e-24	198058557	198058489
sil_5008209	2_up	114	66/68	97	5e-24	202069270	202069203
SNP_1051309	2_up	125	69/69	100	3e-27	207580633	207580701
SNP_1078579	2_up	125	69/69	100	3e-27	211335847	211335779
sil_4997678	2_up	114	66/68	97	5e-24	240912441	240912508
sil_1720432	2_up	120	68/69	99	1e-25	261832602	261832670
sil_2305243	2_up	125	69/69	100	3e-27	267841815	267841747
sil_5007137	2_up	116	67/69	97	1e-24	268996774	268996706
sil_4996429	2_up	111	66/68	97	6e-23	269270675	269270609
sil_1222924	2_up	120	68/69	99	1e-25	270464598	270464666
sil_1247991	2_up	125	69/69	100	3e-27	279500158	279500226
sil_4996797	2_up	116	67/69	97	1e-24	280882673	280882605
sil_3572318	2_up	114	66/68	97	5e-24	307976202	307976135
sil_5006614	2_up	120	68/69	99	1e-25	311248095	311248027
sil_3572418	2_up	116	67/69	97	1e-24	329629357	329629425
sil_4998043	2_up	120	68/69	99	1e-25	379295610	379295542
sil_1230947	2_up	120	68/69	99	1e-25	386296865	386296797
sil_1380482	2_up	125	69/69	100	3e-27	392713641	392713573
sil_1236852	2_up	125	69/69	100	3e-27	410855910	410855978
sil_4995895	2_up	114	66/68	97	5e-24	471268253	471268320
sil_1136456	2_up	125	69/69	100	3e-27	478908320	478908388
SNP_2254482	2_up	125	69/69	100	3e-27	486213228	486213160
SNP_1089706	2_up	125	69/69	100	3e-27	499579785	499579717	2	110.44
SNP_3949514	2_up	125	69/69	100	3e-27	501317542	501317610
sil_1044076	2_up	125	69/69	100	3e-27	509198859	509198791
SNP_1071071	2_up	125	69/69	100	3e-27	537252710	537252778	2	112.73
sil_1058113	2_up	120	68/69	99	1e-25	550686636	550686568
sil_3570730	2_up	116	67/69	97	1e-24	550686636	550686568
SNP_989279	2_up	125	69/69	100	3e-27	554101459	554101527	2	119.83
sil_1281681	2_up	113	67/69	97	2e-23	566208089	566208023
sil_3572594	2_up	116	67/69	97	1e-24	576931512	576931580
sil_1108344	2_up	125	69/69	100	3e-27	578607774	578607842
sil_1019171	2_up	125	69/69	100	3e-27	580721611	580721679
sil_1118205	2_up	125	69/69	100	3e-27	583164775	583164843
sil_4995841	2_up	116	68/69	99	1e-24	583164775	583164842
sil_4998182	2_up	120	68/69	99	1e-25	585794852	585794920
sil_5003279	2_up	113	67/69	97	2e-23	587017397	587017465
sil_1091102	2_up	125	69/69	100	3e-27	592698217	592698285
sil_1216708	2_up	125	69/69	100	3e-27	593896906	593896838
sil_1216482	2_up	125	69/69	100	3e-27	594580218	594580286
sil_1147720	2_up	120	68/69	99	1e-25	598642278	598642210
sil_1003830	2_up	116	67/69	97	1e-24	601340049	601340117
SNP_1130271	2_up	125	69/69	100	3e-27	602811991	602811923
sil_4733743	2_up	120	68/69	99	1e-25	604627394	604627326
sil_1090015	2_up	125	69/69	100	3e-27	605000930	605000862
sil_5002059	2_up	120	68/69	99	1e-25	605041981	605041913
SNP_1078668	2_up	125	69/69	100	3e-27	605798317	605798385	2	125.87
SNP_1206779	2_up	125	69/69	100	3e-27	605804656	605804724
SNP_1094692	2_up	125	69/69	100	3e-27	606320409	606320477	2	125.17
sil_2275686	2_up	125	69/69	100	3e-27	607841938	607841870
SNP_100020205	2_up	125	69/69	100	3e-27	608872032	608872100
sil_4994556	2_up	120	68/69	99	1e-25	611281814	611281746
sil_1673778	2_up	125	69/69	100	3e-27	611315559	611315627
SNP_1050727	2_up	125	69/69	100	3e-27	612409783	612409715	2	130.76
sil_3573146	2_up	114	66/68	97	5e-24	613221182	613221249
SNP_3574462	2_up	114	66/68	97	5e-24	613720754	613720821	2	130.76
sil_1020854	2_up	125	69/69	100	3e-27	615525695	615525627
sil_994526	2_up	125	69/69	100	3e-27	618281937	618281869
sil_1112261	2_up	125	69/69	100	3e-27	624452753	624452685
sil_3572193	2_up	116	67/69	97	1e-24	624967867	624967799
sil_5005582	2_up	116	67/69	97	1e-24	625764533	625764465
SNP_1089536	2_up	125	69/69	100	3e-27	625958153	625958221	2	134.52
sil_5009601	2_up	125	69/69	100	3e-27	630068614	630068682
SNP_3574781	2_up	120	68/69	99	1e-25	631968820	631968888	2	135.62
sil_1009493	2_up	125	69/69	100	3e-27	632673082	632673150
sil_2320423	2_up	120	68/69	99	1e-25	661151300	661151232
sil_997699	2_up	125	69/69	100	3e-27	672398993	672398925
sil_2263542	2_up	125	69/69	100	3e-27	672526552	672526484
SNP_1077755	2_up	125	69/69	100	3e-27	673309766	673309834	2	150.18
sil_5006245	2_up	116	67/69	97	1e-24	673549207	673549139
SNP_1012287	2_up	125	69/69	100	3e-27	679848109	679848177
sil_3573554	2_up	125	69/69	100	3e-27	683139332	683139264
SNP_1014776	2_up	125	69/69	100	3e-27	683568428	683568496
SNP_1216892	2_up	125	69/69	100	3e-27	683718046	683717978	2	156.24
sil_2297292	2_up	125	69/69	100	3e-27	685036818	685036886
sil_2336993	2_up	125	69/69	100	3e-27	685037503	685037571
SNP_1069402	2_up	125	69/69	100	3e-27	686695190	686695122
sil_1055064	2_up	125	69/69	100	3e-27	686797541	686797473
SNP_2276201	2_up	125	69/69	100	3e-27	688622154	688622086
sil_1272881	2_up	125	69/69	100	3e-27	690729022	690728954
SNP_3953991	2_up	125	69/69	100	3e-27	690747639	690747707
SNP_1216386	2_up	125	69/69	100	3e-27	691531849	691531781
SNP_100018101	2_up	125	69/69	100	3e-27	692230731	692230799
sil_2251565	2_up	125	69/69	100	3e-27	692709913	692709981
SNP_996421	2_up	125	69/69	100	3e-27	692726223	692726291
SNP_1147583	2_up	125	69/69	100	3e-27	693243188	693243256
sil_3573209	2_up	114	66/68	97	5e-24	693359039	693358972
sil_1080633	2_up	125	69/69	100	3e-27	696041177	696041109
sil_5002612	2_up	113	67/69	97	2e-23	696218798	696218865
SNP_2275371	2_up	125	69/69	100	3e-27	702866209	702866277	2	161.14
sil_1093596	2_up	125	69/69	100	3e-27	702951156	702951088
sil_4911036	2_up	120	68/69	99	1e-25	703105304	703105372
sil_1208214	2_up	125	69/69	100	3e-27	705268386	705268454
SNP_1861237	2_up	118	67/68	99	4e-25	706889907	706889840
sil_1047205	2_up	123	68/68	100	1e-26	706929153	706929220
sil_3571536	2_up	116	67/69	97	1e-24	706929153	706929221
sil_1764004	2_up	125	69/69	100	3e-27	707803937	707803869
sil_1055288	2_up	125	69/69	100	3e-27	709048991	709049059
sil_1094537	2_up	125	69/69	100	3e-27	709173854	709173922
SNP_2259754	2_up	125	69/69	100	3e-27	709248383	709248451	2	167.94
SNP_1229562	2_up	125	69/69	100	3e-27	711461255	711461323
sil_5009748	2_up	111	66/68	97	6e-23	711468133	711468198
sil_2357011	2_up	125	69/69	100	3e-27	713125139	713125207
sil_2269476	2_up	120	68/69	99	1e-25	714652429	714652361
sil_5007738	2_up	116	68/69	99	1e-24	715472078	715472145
sil_3573307	2_up	125	69/69	100	3e-27	717389459	717389391
sil_1860772	2_up	125	69/69	100	3e-27	718088406	718088338
SNP_100016436	2_up	114	66/68	97	5e-24	718484823	718484890
sil_3959176	2_up	125	69/69	100	3e-27	718730528	718730460
sil_1669898	2_up	118	67/68	99	4e-25	718817913	718817980
SNP_1070839	2_up	125	69/69	100	3e-27	718838825	718838757
sil_1315663	2_up	120	68/69	99	1e-25	719404693	719404625
sil_1142997	2_up	125	69/69	100	3e-27	719794035	719794103
sil_1087662	2_up	125	69/69	100	3e-27	723062413	723062345
sil_1090516	2_up	123	68/68	100	1e-26	724017690	724017757
sil_1094507	2_up	125	69/69	100	3e-27	726100084	726100152
sil_1208934	2_up	125	69/69	100	3e-27	726387673	726387741
sil_5006281	2_up	113	67/69	97	2e-23	726387673	726387740
SNP_1107385	2_up	125	69/69	100	3e-27	728229864	728229796	2	188.42
SNP_100005830	2_up	120	68/69	99	1e-25	728410166	728410098
SNP_2372250	2_up	125	69/69	100	3e-27	728790463	728790531
sil_5004259	2_up	120	68/69	99	1e-25	728926085	728926153
sil_1018702	2_up	125	69/69	100	3e-27	729546994	729547062
sil_1114336	2_up	125	69/69	100	3e-27	732550235	732550303
sil_1210028	2_up	125	69/69	100	3e-27	732565932	732566000
SNP_1075798	2_up	125	69/69	100	3e-27	734108735	734108803
SNP_1165421	2_up	125	69/69	100	3e-27	734292835	734292767	2	193.66
sil_2323186	2_up	116	67/69	97	1e-24	734508906	734508974
sil_1136600	2_up	120	68/69	99	1e-25	734586812	734586880
sil_1091052	2_up	125	69/69	100	3e-27	734586815	734586747
SNP_977718	2_up	125	69/69	100	3e-27	734888093	734888161
sil_1247087	2_up	120	68/69	99	1e-25	734889110	734889042
sil_4999519	2_up	116	67/69	97	1e-24	734889110	734889042
sil_5009738	2_up	116	67/69	97	1e-24	734889110	734889042
SNP_1022075	2_up	125	69/69	100	3e-27	734988626	734988694
SNP_1133197	2_up	125	69/69	100	3e-27	735350164	735350232
SNP_1088061	2_up	125	69/69	100	3e-27	735690805	735690737	2	196.32
sil_1098195	2_up	125	69/69	100	3e-27	735701569	735701501
sil_3572127	2_up	113	67/69	97	2e-23	735701809	735701876
sil_1092980	2_up	120	68/69	99	1e-25	735743106	735743174
sil_5008555	2_up	118	67/68	99	4e-25	736800397	736800330
sil_1163089	2_up	120	68/69	99	1e-25	737838143	737838075
sil_3573814	2_up	118	67/68	99	4e-25	740010940	740010873
sil_5005688	2_up	118	67/68	99	4e-25	740370187	740370120
sil_984943	2_up	125	69/69	100	3e-27	741332822	741332890
SNP_978081	2_up	125	69/69	100	3e-27	744530426	744530358
sil_1064979	2_up	125	69/69	100	3e-27	744700866	744700934
sil_2263855	2_up	125	69/69	100	3e-27	744904868	744904800
sil_1091680	2_up	125	69/69	100	3e-27	746916591	746916523
sil_1074473	2_up	125	69/69	100	3e-27	748820743	748820675
sil_2275938	2_up	125	69/69	100	3e-27	749448132	749448200
sil_1016489	2_up	120	68/69	99	1e-25	750201766	750201834
sil_4999685	2_up	116	67/69	97	1e-24	750531453	750531385
sil_1207505	2_up	116	67/69	97	1e-24	750550260	750550328
sil_1218546	2_up	120	68/69	99	1e-25	751197748	751197680
sil_1216887	2_up	125	69/69	100	3e-27	751526448	751526516
SNP_1220546	2_up	125	69/69	100	3e-27	751661964	751662032
SNP_2325035	2_up	125	69/69	100	3e-27	751844334	751844402	2	207.46
sil_2278946	2_up	116	67/69	97	1e-24	751844337	751844269
sil_1022665	2_up	116	67/69	97	1e-24	751893237	751893169
sil_1106995	2_up	125	69/69	100	3e-27	752799831	752799763
sil_4995134	2_up	116	67/69	97	1e-24	753053185	753053253
sil_1062839	2_up	125	69/69	100	3e-27	753569394	753569462
sil_1120396	2_up	125	69/69	100	3e-27	755327912	755327980
SNP_4544261	2_up	116	67/69	97	1e-24	755704130	755704198
SNP_2281375	2_up	120	68/69	99	1e-25	756929079	756929011	2	215.08
SNP_1223066	2_down	120	68/69	99	1e-25	780778015	780777947	2	226.18
sil_1219162	2_down	125	69/69	100	3e-27	779944160	779944228
SNP_1195050	2_down	120	68/69	99	1e-25	779878427	779878495
SNP_1270455	2_down	118	67/68	99	4e-25	779675284	779675217
sil_5005977	2_down	125	69/69	100	3e-27	779302483	779302551
SNP_1071003	2_down	125	69/69	100	3e-27	779300424	779300356
SNP_3022671	2_down	125	69/69	100	3e-27	779300421	779300489
sil_1089389	2_down	116	67/69	97	1e-24	779299966	779299898
sil_3946326	2_down	125	69/69	100	3e-27	779215662	779215730
sil_3573192	2_down	120	68/69	99	1e-25	779195537	779195469
sil_1217212	2_down	125	69/69	100	3e-27	778282792	778282860
sil_3960583	2_down	125	69/69	100	3e-27	778168603	778168671
sil_4994074	2_down	125	69/69	100	3e-27	778121596	778121528
sil_5001626	2_down	125	69/69	100	3e-27	778019108	778019040
SNP_1217561	2_down	125	69/69	100	3e-27	777936461	777936393	2	227.18
sil_4998979	2_down	120	68/69	99	1e-25	777912154	777912086
SNP_100021591	2_down	120	68/69	99	1e-25	777907653	777907721
SNP_1058958	2_down	125	69/69	100	3e-27	777841673	777841605
sil_1723353	2_down	125	69/69	100	3e-27	776396847	776396915
sil_1228079	2_down	116	67/69	97	1e-24	775734045	775734113
SNP_999758	2_down	125	69/69	100	3e-27	775308908	775308976
sil_1056803	2_down	125	69/69	100	3e-27	775299405	775299473
sil_985217	2_down	125	69/69	100	3e-27	774840471	774840539
SNP_1695453	2_down	125	69/69	100	3e-27	772657505	772657573
sil_1066049	2_down	125	69/69	100	3e-27	772220952	772220884
SNP_1066049	2_down	125	69/69	100	3e-27	772220952	772220884	2	239.75
SNP_2293787	2_down	125	69/69	100	3e-27	772211627	772211559	2	239.39
sil_977707	2_down	125	69/69	100	3e-27	771797779	771797847
sil_3571587	2_down	120	68/69	99	1e-25	771547021	771547089
sil_4998531	2_down	116	67/69	97	1e-24	771528864	771528932
sil_1095302	2_down	125	69/69	100	3e-27	770984151	770984219
sil_1032108	2_down	125	69/69	100	3e-27	770103952	770104020
sil_1088610	2_down	125	69/69	100	3e-27	769473535	769473603
sil_1064065	2_down	125	69/69	100	3e-27	769192822	769192890
SNP_1100850	2_down	125	69/69	100	3e-27	769003095	769003163
SNP_1150218	2_down	125	69/69	100	3e-27	768997841	768997909	2	246.04
sil_3573598	2_down	125	69/69	100	3e-27	768529043	768528975
SNP_3570180	2_down	125	69/69	100	3e-27	767950699	767950767
sil_2247010	2_down	116	67/69	97	1e-24	767569019	767568951
sil_5006479	2_down	125	69/69	100	3e-27	767559542	767559610
sil_3572115	2_down	113	67/69	97	2e-23	767312743	767312676
sil_1041226	2_down	125	69/69	100	3e-27	767023520	767023588
sil_1128058	2_down	125	69/69	100	3e-27	766710336	766710404
sil_4008260	2_down	125	69/69	100	3e-27	766594295	766594227
sil_4994811	2_down	113	67/69	97	2e-23	765958689	765958623
sil_1106737	2_down	125	69/69	100	3e-27	765958689	765958621
sil_1024178	2_down	125	69/69	100	3e-27	765677047	765677115
SNP_983095	2_down	125	69/69	100	3e-27	765373195	765373127
sil_3948523	2_down	125	69/69	100	3e-27	765263561	765263493
sil_1104401	2_down	125	69/69	100	3e-27	765192739	765192671
sil_2247567	2_down	125	69/69	100	3e-27	765041445	765041513
sil_1275095	2_down	125	69/69	100	3e-27	764941685	764941753
sil_1303807	2_down	120	68/69	99	1e-25	764860772	764860704
sil_1107187	2_down	125	69/69	100	3e-27	764785335	764785267
sil_1010882	2_down	125	69/69	100	3e-27	764678234	764678302
SNP_1184316	2_down	125	69/69	100	3e-27	763871729	763871797
sil_1105417	2_down	125	69/69	100	3e-27	763798744	763798812
sil_2289207	2_down	125	69/69	100	3e-27	763485728	763485796
sil_1090740	2_down	125	69/69	100	3e-27	763481021	763480953
sil_1106927	2_down	125	69/69	100	3e-27	763406033	763406101
sil_5009193	2_down	116	67/69	97	1e-24	762261508	762261440
sil_1239237	2_down	125	69/69	100	3e-27	762144204	762144272
sil_1024346	2_down	125	69/69	100	3e-27	761014998	761015066
sil_5007131	2_down	125	69/69	100	3e-27	761011722	761011790
sil_2245060	2_down	120	68/69	99	1e-25	760918604	760918536
sil_1022729	2_down	120	68/69	99	1e-25	760771111	760771179
sil_4411024	2_down	123	68/68	100	1e-26	760131995	760131928
sil_4407652	2_down	120	68/69	99	1e-25	760131995	760131927
sil_4405786	2_down	120	68/69	99	1e-25	760131995	760131927
sil_1282818	2_down	125	69/69	100	3e-27	759812917	759812985
sil_1711467	2_down	116	67/69	97	1e-24	759657793	759657861
SNP_1052066	2_down	125	69/69	100	3e-27	759463295	759463363
SNP_1051352	2_down	125	69/69	100	3e-27	758940105	758940037
sil_1060943	2_down	125	69/69	100	3e-27	758893344	758893276
sil_1385652	2_down	120	68/69	99	1e-25	758881814	758881882
sil_977695	2_down	125	69/69	100	3e-27	757979337	757979269
sil_3956896	2_down	125	69/69	100	3e-27	756949663	756949595
SNP_1017788	3	120	68/69	99	1e-25	749867368	749867300
sil_1278449	3	120	68/69	99	1e-25	747301986	747301918
sil_4004058	3	125	69/69	100	3e-27	747286209	747286141
sil_1067085	3	125	69/69	100	3e-27	747033305	747033237
sil_1107213	3	125	69/69	100	3e-27	746963994	746963926
sil_1115656	3	116	67/69	97	1e-24	746963994	746963926
SNP_1075480	3	125	69/69	100	3e-27	746378968	746378900	3	0.64
sil_2278099	3	120	68/69	99	1e-25	746309239	746309171
sil_3573738	3	125	69/69	100	3e-27	745820182	745820114
sil_1267539	3	125	69/69	100	3e-27	745457082	745457014
sil_1255122	3	125	69/69	100	3e-27	744957603	744957535
SNP_1218175	3	125	69/69	100	3e-27	744901031	744900963
SNP_100011386	3	123	68/68	100	1e-26	743807195	743807262
sil_1267588	3	114	66/68	97	5e-24	743193869	743193936
sil_1136296	3	120	68/69	99	1e-25	742886699	742886631
sil_1387129	3	125	69/69	100	3e-27	742375378	742375446
sil_4994755	3	120	68/69	99	1e-25	741790207	741790139
sil_5004649	3	120	68/69	99	1e-25	741662550	741662482
sil_3575643	3	120	68/69	99	1e-25	741252831	741252763
sil_1088248	3	125	69/69	100	3e-27	740862036	740862104
SNP_100006420	3	120	68/69	99	1e-25	740093268	740093200
sil_5003309	3	116	67/69	97	1e-24	739309669	739309601
sil_1021341	3	120	68/69	99	1e-25	738728086	738728018
sil_981366	3	125	69/69	100	3e-27	737685376	737685444
sil_4999068	3	116	67/69	97	1e-24	737508055	737508123
sil_5007288	3	114	66/68	97	5e-24	737295391	737295458
sil_1081930	3	125	69/69	100	3e-27	737253250	737253182
sil_1204942	3	125	69/69	100	3e-27	736974278	736974346
SNP_100040961	3	120	68/69	99	1e-25	736973908	736973840
sil_1018669	3	125	69/69	100	3e-27	736815859	736815927
sil_1215735	3	125	69/69	100	3e-27	736320179	736320111
sil_5009436	3	114	66/68	97	5e-24	735865498	735865565
sil_4997458	3	114	66/68	97	5e-24	735850571	735850504
SNP_1092779	3	125	69/69	100	3e-27	734443255	734443187
sil_1094416	3	125	69/69	100	3e-27	733862993	733863061
SNP_2276130	3	125	69/69	100	3e-27	732485158	732485090
sil_3570256	3	120	68/69	99	1e-25	731995481	731995549
sil_3571349	3	116	67/69	97	1e-24	731550090	731550022
sil_2256286	3	120	68/69	99	1e-25	731219789	731219721
sil_1195058	3	125	69/69	100	3e-27	731219539	731219471
sil_1408609	3	125	69/69	100	3e-27	731075369	731075301
sil_1019136	3	120	68/69	99	1e-25	731075366	731075434
sil_5010516	3	116	67/69	97	1e-24	730295841	730295909
SNP_1100161	3	125	69/69	100	3e-27	729316608	729316540
sil_1106161	3	125	69/69	100	3e-27	727764367	727764299
sil_993112	3	125	69/69	100	3e-27	727348982	727349050
sil_986175	3	123	68/68	100	1e-26	725066211	725066144
sil_1129436	3	120	68/69	99	1e-25	724330155	724330087
sil_989352	3	125	69/69	100	3e-27	723337375	723337307
sil_4998566	3	116	67/69	97	1e-24	723181321	723181253
SNP_2276624	3	125	69/69	100	3e-27	723181318	723181386
sil_1074096	3	125	69/69	100	3e-27	722505461	722505529
sil_5008505	3	116	67/69	97	1e-24	722270857	722270789
sil_1080050	3	125	69/69	100	3e-27	721569552	721569620
sil_3021413	3	120	68/69	99	1e-25	720869733	720869665
sil_4994658	3	116	67/69	97	1e-24	719387023	719386955
SNP_1122511	3	125	69/69	100	3e-27	719047742	719047674
sil_1115228	3	120	68/69	99	1e-25	717844169	717844101
SNP_1046576	3	120	68/69	99	1e-25	717293025	717292957
SNP_100005369	3	116	67/69	97	1e-24	717015634	717015566
SNP_1079045	3	125	69/69	100	3e-27	716847034	716847102	3	38.83
SNP_3947649	3	125	69/69	100	3e-27	716647542	716647474	3	48.77
SNP_979424	3	125	69/69	100	3e-27	716532183	716532115
sil_1089375	3	125	69/69	100	3e-27	716528015	716528083
sil_1177721	3	125	69/69	100	3e-27	715279231	715279299
sil_982276	3	125	69/69	100	3e-27	711420602	711420534
SNP_982276	3	125	69/69	100	3e-27	711420602	711420534
sil_5010457	3	120	68/69	99	1e-25	711218314	711218246
SNP_1233269	3	125	69/69	100	3e-27	711135484	711135552	3	55.89
sil_1233269	3	125	69/69	100	3e-27	711135484	711135552
sil_989772	3	123	68/68	100	1e-26	710370878	710370811
sil_1037552	3	125	69/69	100	3e-27	709066967	709066899
sil_1179773	3	125	69/69	100	3e-27	709062293	709062225
sil_1093497	3	125	69/69	100	3e-27	708752345	708752277
sil_3573503	3	116	67/69	97	1e-24	708752342	708752410
sil_2276559	3	125	69/69	100	3e-27	708095593	708095661
sil_5000696	3	116	67/69	97	1e-24	707833486	707833554
sil_1018354	3	125	69/69	100	3e-27	707649441	707649373
sil_2278121	3	116	67/69	97	1e-24	707620029	707620097
sil_1081769	3	125	69/69	100	3e-27	707348971	707348903
sil_1242275	3	120	68/69	99	1e-25	707169405	707169473
SNP_1092487	3	125	69/69	100	3e-27	706775707	706775639
sil_5008988	3	116	67/69	97	1e-24	704716949	704717017
sil_5007215	3	114	66/68	97	5e-24	703773546	703773479
sil_1228792	3	125	69/69	100	3e-27	700945834	700945902
sil_1219627	3	125	69/69	100	3e-27	700752496	700752564
sil_1114327	3	125	69/69	100	3e-27	700699093	700699025
SNP_2277485	3	125	69/69	100	3e-27	700209754	700209822	3	67.7
SNP_1065104	3	125	69/69	100	3e-27	699483618	699483550
sil_2306503	3	125	69/69	100	3e-27	698703560	698703492
sil_985642	3	120	68/69	99	1e-25	697787032	697786964
sil_5005844	3	118	67/68	99	4e-25	697782858	697782791
sil_1119060	3	125	69/69	100	3e-27	696646242	696646174
sil_1088497	3	125	69/69	100	3e-27	691041856	691041924
sil_1049355	3	125	69/69	100	3e-27	690962877	690962809
SNP_1114324	3	125	69/69	100	3e-27	689366640	689366572	3	77.89
sil_5009861	3	123	68/68	100	1e-26	688678440	688678373
SNP_1226990	3	125	69/69	100	3e-27	688591320	688591252
sil_1213561	3	116	67/69	97	1e-24	688449930	688449998
sil_982739	3	125	69/69	100	3e-27	687528846	687528778
SNP_1028212	3	125	69/69	100	3e-27	686906943	686906875
sil_1388548	3	113	67/69	97	2e-23	686201320	686201386
SNP_2330716	3	125	69/69	100	3e-27	684875601	684875669
sil_1231255	3	120	68/69	99	1e-25	674539902	674539834
SNP_1077884	3	125	69/69	100	3e-27	672801315	672801247
sil_1227404	3	125	69/69	100	3e-27	671646249	671646181
sil_1073964	3	120	68/69	99	1e-25	663440968	663440900
sil_997335	3	125	69/69	100	3e-27	663182739	663182807
SNP_3022194	3	125	69/69	100	3e-27	662932778	662932846	3	91.87
sil_5007855	3	113	67/69	97	2e-23	658846429	658846496
SNP_1079639	3	125	69/69	100	3e-27	658048755	658048823
SNP_2293071	3	125	69/69	100	3e-27	649815961	649815893	3	97.19
SNP_100011003	3	123	68/68	100	1e-26	649540499	649540566
sil_994545	3	125	69/69	100	3e-27	648555411	648555479
SNP_1695356	3	125	69/69	100	3e-27	647482664	647482596
SNP_1045330	3	125	69/69	100	3e-27	647153217	647153285
sil_2256663	3	125	69/69	100	3e-27	647019830	647019762
sil_3570844	3	120	68/69	99	1e-25	647019827	647019895
sil_1218916	3	125	69/69	100	3e-27	646854718	646854786
sil_980136	3	116	67/69	97	1e-24	646584907	646584975
sil_3064362	3	125	69/69	100	3e-27	645404717	645404785
SNP_2255197	3	125	69/69	100	3e-27	642126362	642126294	3	104.19
SNP_2255824	3	125	69/69	100	3e-27	641558695	641558763
SNP_1106097	3	125	69/69	100	3e-27	641404214	641404146	3	104.71
SNP_985496	3	125	69/69	100	3e-27	640363857	640363925	3	104.71
SNP_1205947	3	125	69/69	100	3e-27	637290756	637290688	3	106.29
sil_1018396	3	125	69/69	100	3e-27	635508594	635508662
sil_1029052	3	125	69/69	100	3e-27	635328695	635328763
sil_1103761	3	125	69/69	100	3e-27	635319730	635319662
sil_1119916	3	125	69/69	100	3e-27	635154600	635154668
SNP_100008001	3	120	68/69	99	1e-25	630916251	630916319
sil_4998683	3	125	69/69	100	3e-27	629624019	629624087
sil_3572705	3	125	69/69	100	3e-27	629172189	629172257
SNP_1082841	3	120	68/69	99	1e-25	627917234	627917166	3	109.39
sil_2327075	3	120	68/69	99	1e-25	627683626	627683558
SNP_2242563	3	125	69/69	100	3e-27	626073224	626073156
SNP_999525	3	120	68/69	99	1e-25	621592828	621592896	3	110.91
SNP_1088634	3	125	69/69	100	3e-27	621515006	621515074	3	110.91
sil_5004025	3	116	67/69	97	1e-24	621010417	621010485
SNP_1064085	3	125	69/69	100	3e-27	619091940	619091872	3	110.91
sil_5007212	3	113	67/69	97	2e-23	616488298	616488365
sil_1150049	3	125	69/69	100	3e-27	614570289	614570221
SNP_1247304	3	125	69/69	100	3e-27	611952529	611952461
SNP_1089879	3	125	69/69	100	3e-27	611944924	611944992	3	109.11
sil_1018140	3	125	69/69	100	3e-27	609947414	609947482
sil_1125220	3	125	69/69	100	3e-27	608744656	608744588
SNP_1081177	3	125	69/69	100	3e-27	608483310	608483242	3	112
sil_5008595	3	118	67/68	99	4e-25	608337035	608337102
SNP_100006421	3	116	67/69	97	1e-24	606740479	606740411
sil_5003444	3	113	67/69	97	2e-23	605245153	605245086
SNP_1057213	3	125	69/69	100	3e-27	602920861	602920793	3	113.02
sil_1099648	3	125	69/69	100	3e-27	602856446	602856378
SNP_2276306	3	125	69/69	100	3e-27	600671924	600671856
sil_1861767	3	125	69/69	100	3e-27	599993630	599993698
SNP_1088641	3	125	69/69	100	3e-27	598551750	598551682
SNP_100004580	3	120	68/69	99	1e-25	596150342	596150410
SNP_1672000	3	125	69/69	100	3e-27	594623471	594623403	3	116.56
SNP_1224218	3	125	69/69	100	3e-27	592491745	592491813	3	119.13
sil_1695414	3	120	68/69	99	1e-25	592489916	592489984
SNP_985222	3	125	69/69	100	3e-27	592171309	592171241	3	120.25
SNP_2257103	3	125	69/69	100	3e-27	586422995	586422927	3	121.13
sil_2290122	3	125	69/69	100	3e-27	583974414	583974346
SNP_1397650	3	125	69/69	100	3e-27	579340637	579340705
SNP_987498	3	125	69/69	100	3e-27	575948050	575948118
sil_1201639	3	120	68/69	99	1e-25	575484987	575484919
SNP_1024200	3	125	69/69	100	3e-27	568019462	568019530	3	124.87
sil_4999591	3	125	69/69	100	3e-27	566824795	566824727
sil_3570442	3	116	67/69	97	1e-24	557448455	557448387
sil_1080749	3	125	69/69	100	3e-27	556360416	556360348
sil_1092775	3	116	67/69	97	1e-24	550657529	550657461
sil_1094783	3	120	68/69	99	1e-25	547981133	547981201
SNP_978304	3	125	69/69	100	3e-27	543179334	543179402
SNP_100000975	3	116	67/69	97	1e-24	536782214	536782146
SNP_1218636	3	125	69/69	100	3e-27	533659091	533659159
SNP_1148900	3	125	69/69	100	3e-27	531630374	531630306	3	125.88
sil_5005519	3	125	69/69	100	3e-27	529621126	529621058
sil_1070933	3	125	69/69	100	3e-27	526866897	526866965
sil_1125482	3	120	68/69	99	1e-25	523157881	523157813
sil_4997669	3	113	67/69	97	2e-23	521940195	521940127
sil_5003341	3	114	66/68	97	5e-24	521940195	521940128
sil_4004843	3	120	68/69	99	1e-25	514558982	514558914
sil_4998715	3	114	66/68	97	5e-24	511213714	511213647
SNP_100005252	3	116	67/69	97	1e-24	510306240	510306172
sil_5005131	3	123	68/68	100	1e-26	509552604	509552671
SNP_100008320	3	116	67/69	97	1e-24	509036980	509036912
SNP_3574402	3	125	69/69	100	3e-27	508185352	508185420
sil_2254745	3	125	69/69	100	3e-27	508181800	508181868
SNP_982904	3	125	69/69	100	3e-27	507639533	507639465	3	130.19
sil_4998118	3	116	67/69	97	1e-24	506803912	506803980
sil_5007160	3	120	68/69	99	1e-25	506227863	506227931
sil_1037522	3	120	68/69	99	1e-25	505737444	505737376
sil_5009345	3	120	68/69	99	1e-25	500862157	500862225
sil_1059586	3	125	69/69	100	3e-27	495078164	495078096
SNP_100012163	3	116	67/69	97	1e-24	490163049	490163117
sil_5002344	3	120	68/69	99	1e-25	483483953	483483885
SNP_981918	3	125	69/69	100	3e-27	483483183	483483115	3	139.43
sil_2277005	3	125	69/69	100	3e-27	482400782	482400714
sil_1209959	3	125	69/69	100	3e-27	482400779	482400847
SNP_980069	3	125	69/69	100	3e-27	478165365	478165297
SNP_1053994	3	125	69/69	100	3e-27	467811089	467811021
SNP_100012392	3	114	66/68	97	5e-24	459376455	459376388
sil_2317449	3	125	69/69	100	3e-27	444649936	444650004
sil_1101339	3	125	69/69	100	3e-27	396304131	396304199
sil_1090328	3	125	69/69	100	3e-27	369489311	369489243
sil_2276434	3	125	69/69	100	3e-27	352894944	352894876
sil_4994458	3	118	67/68	99	4e-25	326418139	326418072
sil_3571939	3	116	67/69	97	1e-24	282644327	282644259
sil_4995624	3	116	67/69	97	1e-24	267318706	267318638
sil_1090430	3	125	69/69	100	3e-27	234978174	234978242
sil_1113676	3	116	67/69	97	1e-24	228580758	228580826
sil_4999336	3	123	68/68	100	1e-26	227349677	227349610
sil_3572956	3	113	67/69	97	2e-23	202367232	202367299
sil_4996596	3	120	68/69	99	1e-25	199698809	199698877
sil_1102137	3	125	69/69	100	3e-27	127837525	127837457
sil_2257084	3	125	69/69	100	3e-27	118574355	118574287
sil_4997577	3	116	67/69	97	1e-24	111063765	111063697
sil_2276933	3	125	69/69	100	3e-27	100345227	100345159
sil_986643	3	125	69/69	100	3e-27	78717844	78717912
sil_1100603	3	125	69/69	100	3e-27	70850007	70849939
sil_1088777	3	116	67/69	97	1e-24	70849133	70849065
sil_5002476	3	120	68/69	99	1e-25	67581730	67581662
sil_1100341	3	125	69/69	100	3e-27	57226396	57226464
SNP_1100820	3	125	69/69	100	3e-27	53341451	53341519
sil_985341	3	125	69/69	100	3e-27	53334031	53334099
SNP_1076900	3	125	69/69	100	3e-27	53206794	53206862	3	171.72
sil_1100333	3	125	69/69	100	3e-27	53033195	53033127
sil_2257590	3	125	69/69	100	3e-27	47283318	47283250
SNP_989247	3	125	69/69	100	3e-27	45086514	45086446	3	176.28
SNP_100004720	3	114	66/68	97	5e-24	44428702	44428635
sil_1235784	3	125	69/69	100	3e-27	42020791	42020723
sil_3575168	3	116	67/69	97	1e-24	41954663	41954731
sil_4003513	3	125	69/69	100	3e-27	41652680	41652612
sil_2306566	3	125	69/69	100	3e-27	41417845	41417913
SNP_1090892	3	125	69/69	100	3e-27	40913437	40913369	3	181.9
sil_5007919	3	116	67/69	97	1e-24	39600887	39600819
sil_1081273	3	125	69/69	100	3e-27	38991827	38991895
sil_3571957	3	118	67/68	99	4e-25	38327477	38327544
sil_3571229	3	120	68/69	99	1e-25	38104978	38104910
SNP_1052434	3	125	69/69	100	3e-27	37814307	37814239
sil_1016681	3	125	69/69	100	3e-27	37341672	37341604
sil_3571548	3	118	67/68	99	4e-25	37234071	37234004
sil_3571758	3	118	67/68	99	4e-25	37234071	37234004
SNP_3574821	3	116	67/69	97	1e-24	37231790	37231722
sil_1238025	3	125	69/69	100	3e-27	36723314	36723246
sil_1131088	3	125	69/69	100	3e-27	32556522	32556454
SNP_1211216	3	125	69/69	100	3e-27	32411946	32412014
sil_1243888	3	125	69/69	100	3e-27	32385306	32385374
sil_1115146	3	125	69/69	100	3e-27	32120759	32120827
sil_5009276	3	116	67/69	97	1e-24	28566622	28566690
SNP_2244760	3	120	68/69	99	1e-25	28476303	28476371	3	193.54
sil_3571017	3	116	67/69	97	1e-24	28476192	28476260
sil_2275800	3	125	69/69	100	3e-27	26260758	26260690
sil_1006017	3	120	68/69	99	1e-25	25897453	25897385
sil_1093918	3	125	69/69	100	3e-27	25041265	25041197
sil_1200848	3	125	69/69	100	3e-27	24532515	24532583
sil_1055682	3	125	69/69	100	3e-27	23830301	23830233
sil_1100905	3	125	69/69	100	3e-27	21101725	21101657
sil_1084598	3	125	69/69	100	3e-27	20558694	20558762
SNP_1092756	3	125	69/69	100	3e-27	20391909	20391841
sil_1215358	3	114	66/68	97	5e-24	20238715	20238782
SNP_1721362	3	120	68/69	99	1e-25	20165253	20165185	3	206.69
sil_1007236	3	120	68/69	99	1e-25	19969161	19969093
sil_5002738	3	116	68/69	99	1e-24	19969161	19969094
SNP_1249812	3	125	69/69	100	3e-27	19477501	19477569	3	207.38
sil_1132761	3	125	69/69	100	3e-27	19374539	19374471
sil_2290133	3	125	69/69	100	3e-27	19302634	19302566
SNP_3575358	3	120	68/69	99	1e-25	18968729	18968797
sil_1254605	3	125	69/69	100	3e-27	17776864	17776796
sil_1137728	3	125	69/69	100	3e-27	17776588	17776656
sil_3222425	3	120	68/69	99	1e-25	15836139	15836071
sil_1096913	3	125	69/69	100	3e-27	15064442	15064510
sil_2289296	3	125	69/69	100	3e-27	12960577	12960645
sil_1070849	3	125	69/69	100	3e-27	12935062	12934994
sil_984569	3	125	69/69	100	3e-27	12927177	12927109
sil_2257019	3	125	69/69	100	3e-27	12872293	12872361
SNP_1088933	3	125	69/69	100	3e-27	12868494	12868562
sil_1110446	3	125	69/69	100	3e-27	12814366	12814298
sil_2256900	3	116	67/69	97	1e-24	12164342	12164274
sil_1235733	3	125	69/69	100	3e-27	11381304	11381236
sil_1175283	3	125	69/69	100	3e-27	11380178	11380246
sil_1033885	3	125	69/69	100	3e-27	10340272	10340204
sil_1237314	3	125	69/69	100	3e-27	9573149	9573217
sil_2261257	3	125	69/69	100	3e-27	9497153	9497085
sil_1156116	3	125	69/69	100	3e-27	9486770	9486838
sil_1084038	3	125	69/69	100	3e-27	9299674	9299606
SNP_1090511	3	120	68/69	99	1e-25	8862454	8862386	3	231.27
sil_977565	3	123	68/68	100	1e-26	8737811	8737878
sil_4407326	3	120	68/69	99	1e-25	8577296	8577364
SNP_1093199	3	120	68/69	99	1e-25	7928413	7928481
sil_1125650	3	125	69/69	100	3e-27	7388779	7388711
sil_2278808	3	120	68/69	99	1e-25	7314752	7314820
sil_1228588	3	116	67/69	97	1e-24	7261655	7261587
sil_1050277	3	120	68/69	99	1e-25	6775804	6775736
sil_5007907	3	123	68/68	100	1e-26	1933344	1933411
sil_1243919	3	125	69/69	100	3e-27	97598	97666
sil_1016226	3	125	69/69	100	3e-27	16947	17015
SNP_1112356	4_up	125	69/69	100	3e-27	610263263	610263195	4	7.42
sil_2325790	4_up	125	69/69	100	3e-27	610709607	610709539
sil_5007980	4_up	114	66/68	97	5e-24	612084623	612084690
sil_5001624	4_up	114	66/68	97	5e-24	613372660	613372727
sil_1860253	4_up	114	66/68	97	5e-24	614099400	614099333
SNP_2276396	4_up	125	69/69	100	3e-27	615181121	615181053
sil_996115	4_up	125	69/69	100	3e-27	616017163	616017095
sil_1275278	4_up	125	69/69	100	3e-27	616241454	616241522
sil_1063157	4_up	125	69/69	100	3e-27	617655074	617655142
sil_1176591	4_up	125	69/69	100	3e-27	617850054	617850122
sil_5004647	4_up	116	67/69	97	1e-24	618591143	618591075
SNP_1213343	4_up	125	69/69	100	3e-27	620779923	620779991
sil_1119468	4_up	125	69/69	100	3e-27	622180668	622180736
sil_1038847	4_up	120	68/69	99	1e-25	625075667	625075735
SNP_100005101	4_up	125	69/69	100	3e-27	625546539	625546471
sil_1270243	4_up	125	69/69	100	3e-27	626322690	626322622
sil_983876	4_up	125	69/69	100	3e-27	626644834	626644766
SNP_1019940	4_up	125	69/69	100	3e-27	632989708	632989776	4	39.09
sil_1022098	4_up	125	69/69	100	3e-27	632990476	632990408
sil_1207344	4_up	125	69/69	100	3e-27	637193605	637193673
sil_1215739	4_up	116	67/69	97	1e-24	642441004	642440936
sil_5007718	4_up	116	67/69	97	1e-24	650882211	650882143
sil_1022127	4_up	125	69/69	100	3e-27	669909431	669909363
sil_5004140	4_up	114	66/68	97	5e-24	676932304	676932371
SNP_2257281	4_up	120	68/69	99	1e-25	676932304	676932372
sil_1353134	4_up	125	69/69	100	3e-27	679161536	679161468
sil_1021577	4_up	116	67/69	97	1e-24	680453191	680453123
sil_1214356	4_up	116	67/69	97	1e-24	713522807	713522875
sil_1859997	4_up	125	69/69	100	3e-27	714424417	714424485
sil_984165	4_up	125	69/69	100	3e-27	728507455	728507523
sil_1019882	4_up	120	68/69	99	1e-25	729932097	729932165
sil_1211516	4_up	116	67/69	97	1e-24	738781733	738781665
sil_1029355	4_down	125	69/69	100	3e-27	2411431	2411499
sil_4544266	4_down	120	68/69	99	1e-25	3370543	3370475
sil_3571929	4_down	114	66/68	97	5e-24	6916047	6915980
sil_1109272	4_down	125	69/69	100	3e-27	18799742	18799810
sil_3955814	4_down	120	68/69	99	1e-25	27182432	27182500
sil_987463	4_down	120	68/69	99	1e-25	32118062	32117994
sil_3571520	4_down	118	67/68	99	4e-25	33622131	33622198
sil_1202938	4_down	125	69/69	100	3e-27	33646546	33646478
SNP_2277818	4_down	125	69/69	100	3e-27	34765949	34766017
sil_1343247	4_down	125	69/69	100	3e-27	36351232	36351300
sil_1201624	4_down	125	69/69	100	3e-27	36795907	36795975
SNP_100003336	4_down	113	67/69	97	2e-23	37036336	37036403
sil_5005247	4_down	123	68/68	100	1e-26	44591060	44590993
sil_1206288	4_down	125	69/69	100	3e-27	45347009	45347077
sil_5002844	4_down	116	67/69	97	1e-24	48890063	48889995
sil_3574683	4_down	118	67/68	99	4e-25	65778207	65778274
sil_1049959	4_down	125	69/69	100	3e-27	82038213	82038145
sil_5003070	4_down	120	68/69	99	1e-25	108482412	108482344
sil_5002471	4_down	123	68/68	100	1e-26	131336067	131336000
SNP_1078265	4_down	125	69/69	100	3e-27	137182302	137182370
sil_1041112	4_down	125	69/69	100	3e-27	195228284	195228216
SNP_1092881	4_down	125	69/69	100	3e-27	201761063	201760995	4	88.03
sil_5004718	4_down	111	66/68	97	6e-23	205326368	205326301
sil_2276031	4_down	125	69/69	100	3e-27	216007204	216007272
sil_4998821	4_down	120	68/69	99	1e-25	238299358	238299290
sil_3570407	4_down	120	68/69	99	1e-25	238299608	238299676
sil_4998802	4_down	120	68/69	99	1e-25	241022475	241022543
sil_4994718	4_down	116	67/69	97	1e-24	241022985	241022917
sil_4998586	4_down	125	69/69	100	3e-27	269099599	269099531
sil_3572346	4_down	116	67/69	97	1e-24	298871108	298871176
sil_5005047	4_down	120	68/69	99	1e-25	308951673	308951605
sil_4541549	4_down	116	67/69	97	1e-24	313890976	313890908
sil_2276016	4_down	125	69/69	100	3e-27	314668738	314668806
SNP_100003060	4_down	120	68/69	99	1e-25	323085605	323085673
sil_4994428	4_down	116	67/69	97	1e-24	355910759	355910691
sil_5009435	4_down	120	68/69	99	1e-25	374569431	374569363
sil_1229789	4_down	125	69/69	100	3e-27	374624795	374624727
sil_1081625	4_down	114	66/68	97	5e-24	420543397	420543464
sil_1088742	4_down	120	68/69	99	1e-25	448253232	448253300
sil_1027914	4_down	125	69/69	100	3e-27	481064569	481064637
SNP_100007327	4_down	114	66/68	97	5e-24	495707715	495707648
sil_1104833	4_down	125	69/69	100	3e-27	504861131	504861199
SNP_2276667	4_down	125	69/69	100	3e-27	521918972	521918904	4	87.49
sil_4995571	4_down	116	67/69	97	1e-24	540016402	540016334
sil_1202665	4_down	125	69/69	100	3e-27	541891213	541891281
SNP_1036953	4_down	125	69/69	100	3e-27	544380536	544380604	4	92.22
SNP_1058474	4_down	125	69/69	100	3e-27	547519391	547519459
SNP_100005057	4_down	116	67/69	97	1e-24	551137234	551137302
sil_5003689	4_down	116	67/69	97	1e-24	563551816	563551748
SNP_2276148	4_down	125	69/69	100	3e-27	565761572	565761504	4	97.99
sil_1395477	4_down	125	69/69	100	3e-27	567494384	567494452
sil_1074654	4_down	125	69/69	100	3e-27	568192510	568192442
sil_4997248	4_down	120	68/69	99	1e-25	568507838	568507906
sil_1066964	4_down	116	67/69	97	1e-24	570462208	570462276
sil_1217078	4_down	125	69/69	100	3e-27	571674535	571674603
sil_1000638	4_down	125	69/69	100	3e-27	572303335	572303403
SNP_100016167	4_down	116	67/69	97	1e-24	572308013	572308081
sil_1051548	4_down	116	67/69	97	1e-24	573661346	573661414
SNP_1074086	4_down	125	69/69	100	3e-27	575013371	575013303	4	108.47
sil_1120094	4_down	125	69/69	100	3e-27	576916020	576915952
sil_1022573	4_down	123	68/68	100	1e-26	584538753	584538686
sil_4998678	4_down	123	68/68	100	1e-26	589486575	589486642
sil_1166056	4_down	125	69/69	100	3e-27	590117868	590117936
sil_1100580	4_down	125	69/69	100	3e-27	590118038	590117970
SNP_1672793	4_down	125	69/69	100	3e-27	590277687	590277619
sil_5002216	4_down	116	67/69	97	1e-24	591071267	591071199
sil_4998271	4_down	116	67/69	97	1e-24	591283987	591284055
sil_5004091	4_down	116	67/69	97	1e-24	591283987	591284055
sil_5009252	4_down	116	67/69	97	1e-24	591283987	591284055
sil_4999311	4_down	120	68/69	99	1e-25	591675434	591675366
sil_5009410	4_down	120	68/69	99	1e-25	592361513	592361581
sil_1093181	4_down	125	69/69	100	3e-27	592529509	592529577
sil_3064357	4_down	125	69/69	100	3e-27	595194430	595194362
sil_1210127	4_down	125	69/69	100	3e-27	595262418	595262486
SNP_1230568	4_down	125	69/69	100	3e-27	596672377	596672309
sil_2256805	4_down	125	69/69	100	3e-27	597143716	597143648
sil_5007429	4_down	114	66/68	97	5e-24	597720270	597720337
sil_4997267	4_down	123	68/68	100	1e-26	597734106	597734039
sil_1111895	4_down	125	69/69	100	3e-27	597734118	597734050
sil_1161630	4_down	125	69/69	100	3e-27	597869325	597869257
SNP_2241770	4_down	125	69/69	100	3e-27	598058928	598058996
sil_4998278	4_down	125	69/69	100	3e-27	598681735	598681667
SNP_1184087	4_down	120	68/69	99	1e-25	599612514	599612582
sil_3021244	4_down	125	69/69	100	3e-27	599844000	599843932
SNP_1277962	4_down	125	69/69	100	3e-27	599898452	599898384	4	147.65
sil_2243981	4_down	125	69/69	100	3e-27	600366602	600366670
sil_2275527	4_down	125	69/69	100	3e-27	600466992	600466924
sil_2277374	4_down	125	69/69	100	3e-27	600686280	600686212
sil_1102711	4_down	125	69/69	100	3e-27	602910762	602910830
sil_1103212	4_down	125	69/69	100	3e-27	603651692	603651760
SNP_1078379	4_down	125	69/69	100	3e-27	603949813	603949881
sil_980152	4_down	125	69/69	100	3e-27	603956399	603956331
SNP_1287183	4_down	125	69/69	100	3e-27	603979921	603979989
sil_1218614	4_down	125	69/69	100	3e-27	605004913	605004981
sil_5005516	4_down	120	68/69	99	1e-25	605004916	605004848
sil_1125279	4_down	125	69/69	100	3e-27	605005138	605005206
sil_1060737	4_down	125	69/69	100	3e-27	605005141	605005073
sil_1013755	4_down	116	67/69	97	1e-24	605645580	605645512
sil_1108568	4_down	125	69/69	100	3e-27	606339493	606339561
sil_5001615	4_down	116	67/69	97	1e-24	606526655	606526723
SNP_100023533	4_down	116	67/69	97	1e-24	608561225	608561293
SNP_1152848	5	125	69/69	100	3e-27	2880374	2880442
sil_2364633	5	125	69/69	100	3e-27	2934695	2934763
sil_1113951	5	125	69/69	100	3e-27	3698927	3698995
sil_5001758	5	118	67/68	99	4e-25	3925896	3925829
sil_1249937	5	125	69/69	100	3e-27	7493751	7493819
sil_3938418	5	120	68/69	99	1e-25	7570676	7570608
SNP_997503	5	125	69/69	100	3e-27	7620567	7620635
SNP_3959157	5	120	68/69	99	1e-25	7620876	7620808	5	10.92
sil_979392	5	125	69/69	100	3e-27	9663258	9663326
sil_994992	5	125	69/69	100	3e-27	10200200	10200132
SNP_1324964	5	125	69/69	100	3e-27	11754080	11754012
sil_1059924	5	125	69/69	100	3e-27	12008972	12008904
sil_4999419	5	120	68/69	99	1e-25	17472522	17472454
sil_1114630	5	125	69/69	100	3e-27	17678317	17678249
SNP_1130731	5	125	69/69	100	3e-27	17685236	17685168	5	22.72
SNP_100011602	5	120	68/69	99	1e-25	18074857	18074925
SNP_1093315	5	125	69/69	100	3e-27	18798208	18798276
SNP_1000068	5	125	69/69	100	3e-27	18857254	18857186
sil_3570823	5	114	66/68	97	5e-24	21737953	21738020
sil_2277083	5	125	69/69	100	3e-27	22211105	22211037
sil_1034344	5	125	69/69	100	3e-27	24160946	24161014
sil_1013863	5	123	68/68	100	1e-26	24176857	24176924
sil_3572278	5	113	67/69	97	2e-23	24188485	24188552
sil_1864468	5	125	69/69	100	3e-27	24402863	24402795
SNP_3574752	5	120	68/69	99	1e-25	25876523	25876455	5	27.86
sil_986784	5	120	68/69	99	1e-25	26118258	26118326
SNP_1171743	5	125	69/69	100	3e-27	28286173	28286241
sil_5006081	5	116	67/69	97	1e-24	29179906	29179974
sil_1106960	5	125	69/69	100	3e-27	29197696	29197628
sil_1115438	5	120	68/69	99	1e-25	31132359	31132291
sil_1203262	5	125	69/69	100	3e-27	31305287	31305355
sil_1080756	5	125	69/69	100	3e-27	31305769	31305837
sil_1111438	5	116	67/69	97	1e-24	32137679	32137747
sil_988252	5	120	68/69	99	1e-25	32191862	32191930
sil_1028502	5	125	69/69	100	3e-27	32606534	32606466
sil_1068597	5	125	69/69	100	3e-27	32736047	32735979
sil_1099890	5	123	68/68	100	1e-26	32800169	32800236
sil_3575755	5	114	66/68	97	5e-24	35259353	35259286
SNP_1207647	5	125	69/69	100	3e-27	35261516	35261584	5	35.52
sil_5007004	5	123	68/68	100	1e-26	35690298	35690231
sil_5001646	5	113	67/69	97	2e-23	36017164	36017097
sil_1228444	5	125	69/69	100	3e-27	36021564	36021496
sil_5009922	5	118	67/68	99	4e-25	36071413	36071346
sil_1032579	5	125	69/69	100	3e-27	36108729	36108797
sil_1063095	5	125	69/69	100	3e-27	36199250	36199182
sil_3575179	5	116	67/69	97	1e-24	36483240	36483172
SNP_2245046	5	125	69/69	100	3e-27	37923464	37923396	5	38.54
sil_3936716	5	125	69/69	100	3e-27	41880041	41879973
sil_1092315	5	125	69/69	100	3e-27	42978887	42978955
sil_1075215	5	125	69/69	100	3e-27	46498259	46498191
sil_2277133	5	125	69/69	100	3e-27	46561819	46561887
SNP_1102928	5	125	69/69	100	3e-27	47529059	47528991
sil_5006524	5	114	66/68	97	5e-24	47965220	47965153
sil_2365521	5	123	68/68	100	1e-26	49515758	49515691
sil_1023575	5	125	69/69	100	3e-27	51675885	51675817
sil_2275491	5	125	69/69	100	3e-27	51810251	51810319
sil_3573185	5	125	69/69	100	3e-27	57246048	57246116
sil_1088666	5	125	69/69	100	3e-27	60250866	60250798
sil_1127387	5	125	69/69	100	3e-27	62960083	62960151
SNP_1201414	5	125	69/69	100	3e-27	67992645	67992577
sil_5006864	5	123	68/68	100	1e-26	68809505	68809438
sil_2275703	5	125	69/69	100	3e-27	69220185	69220117
SNP_1203502	5	125	69/69	100	3e-27	72260128	72260196
sil_1864986	5	120	68/69	99	1e-25	74731122	74731054
sil_5009019	5	116	67/69	97	1e-24	74731122	74731054
sil_1108724	5	125	69/69	100	3e-27	75048585	75048653
SNP_100001375	5	116	67/69	97	1e-24	92478415	92478347
sil_1070054	5	125	69/69	100	3e-27	95056338	95056406
sil_986273	5	125	69/69	100	3e-27	104243098	104243166
sil_2276210	5	125	69/69	100	3e-27	105412977	105412909
sil_1063299	5	125	69/69	100	3e-27	120757374	120757442
sil_1056949	5	125	69/69	100	3e-27	123712134	123712202
SNP_3575315	5	120	68/69	99	1e-25	126909310	126909242
SNP_1273207	5	125	69/69	100	3e-27	127979944	127980012
sil_979056	5	116	67/69	97	1e-24	135162954	135163022
sil_1407764	5	120	68/69	99	1e-25	146093231	146093163
sil_1218006	5	125	69/69	100	3e-27	152094293	152094225
sil_1311167	5	120	68/69	99	1e-25	158501634	158501566
sil_5002121	5	116	67/69	97	1e-24	170828190	170828258
sil_2258942	5	125	69/69	100	3e-27	172062558	172062490
sil_3572450	5	120	68/69	99	1e-25	179563580	179563512
sil_3572409	5	125	69/69	100	3e-27	179563763	179563831
sil_3573942	5	116	67/69	97	1e-24	182250509	182250577
sil_1026910	5	125	69/69	100	3e-27	188064398	188064466
sil_3571591	5	120	68/69	99	1e-25	189471942	189471874
sil_4996379	5	118	67/68	99	4e-25	201492104	201492171
SNP_2248861	5	116	67/69	97	1e-24	214953392	214953460
sil_2288976	5	125	69/69	100	3e-27	219266557	219266625
SNP_1060942	5	125	69/69	100	3e-27	239122271	239122203
SNP_100003764	5	116	67/69	97	1e-24	257642010	257641942
sil_1094668	5	116	67/69	97	1e-24	265968888	265968956
SNP_1052648	5	125	69/69	100	3e-27	266997593	266997525
SNP_3574123	5	116	67/69	97	1e-24	272566555	272566623
sil_1123638	5	125	69/69	100	3e-27	289892241	289892309
sil_3571355	5	116	67/69	97	1e-24	296659976	296659908
sil_1061794	5	125	69/69	100	3e-27	296723130	296723062
sil_1136780	5	125	69/69	100	3e-27	298259030	298258962
sil_1147769	5	125	69/69	100	3e-27	299254476	299254408
sil_3570543	5	125	69/69	100	3e-27	308459089	308459157
sil_1019706	5	125	69/69	100	3e-27	313882187	313882255
SNP_1047731	5	125	69/69	100	3e-27	324075697	324075765
SNP_100014532	5	116	67/69	97	1e-24	330502425	330502493
sil_1274473	5	125	69/69	100	3e-27	332441513	332441581
sil_1104821	5	125	69/69	100	3e-27	338227953	338228021
SNP_2288961	5	125	69/69	100	3e-27	338237874	338237942
sil_3570280	5	125	69/69	100	3e-27	338391811	338391879
sil_5001770	5	120	68/69	99	1e-25	353718411	353718479
sil_4998513	5	125	69/69	100	3e-27	353718414	353718346
sil_1092072	5	125	69/69	100	3e-27	354562745	354562813
sil_3573778	5	116	67/69	97	1e-24	359554878	359554810
sil_1100687	5	125	69/69	100	3e-27	367604917	367604985
sil_2275872	5	125	69/69	100	3e-27	384949779	384949847
sil_5007292	5	113	67/69	97	2e-23	393547884	393547951
SNP_1089360	5	125	69/69	100	3e-27	395703930	395703998
sil_1100953	5	125	69/69	100	3e-27	395839488	395839420
sil_1204105	5	125	69/69	100	3e-27	395852119	395852187
SNP_100111691	5	116	67/69	97	1e-24	395910658	395910726
sil_3572034	5	120	68/69	99	1e-25	397991974	397991906
sil_1219561	5	125	69/69	100	3e-27	400770688	400770620
sil_3575800	5	120	68/69	99	1e-25	414756074	414756006
sil_1699384	5	125	69/69	100	3e-27	426309884	426309952
sil_5001421	5	114	66/68	97	5e-24	426561248	426561315
sil_1281357	5	125	69/69	100	3e-27	430959218	430959286
sil_992914	5	120	68/69	99	1e-25	431892718	431892650
SNP_981730	5	125	69/69	100	3e-27	433234022	433233954
sil_1150172	5	125	69/69	100	3e-27	433566985	433566917
SNP_1150172	5	125	69/69	100	3e-27	433566985	433566917
sil_2277099	5	125	69/69	100	3e-27	433965914	433965982
sil_1216100	5	125	69/69	100	3e-27	436374471	436374539
sil_1019754	5	125	69/69	100	3e-27	437412199	437412131
SNP_2329847	5	125	69/69	100	3e-27	440263748	440263816
SNP_1061058	5	125	69/69	100	3e-27	440672634	440672566
sil_5004908	5	116	67/69	97	1e-24	444922701	444922769
SNP_1315023	5	125	69/69	100	3e-27	448578093	448578161
sil_990542	5	120	68/69	99	1e-25	451877771	451877839
sil_1092246	5	125	69/69	100	3e-27	452210636	452210568
SNP_1048923	5	125	69/69	100	3e-27	453894888	453894820	5	75.96
sil_1201600	5	125	69/69	100	3e-27	454543087	454543019
SNP_3574280	5	120	68/69	99	1e-25	454770588	454770520
sil_1215068	5	120	68/69	99	1e-25	454771101	454771169
sil_5001980	5	118	67/68	99	4e-25	456099470	456099537
sil_4993966	5	120	68/69	99	1e-25	456895891	456895823
sil_5006851	5	116	67/69	97	1e-24	458493694	458493762
SNP_100008451	5	118	67/68	99	4e-25	458524407	458524474
sil_1078002	5	125	69/69	100	3e-27	461003102	461003034
sil_1093269	5	125	69/69	100	3e-27	461266863	461266931
sil_4396019	5	114	66/68	97	5e-24	461901240	461901307
sil_982983	5	125	69/69	100	3e-27	461901240	461901308
SNP_2265468	5	120	68/69	99	1e-25	463090230	463090298	5	85.8
SNP_1129918	5	125	69/69	100	3e-27	463090233	463090165	5	85.8
sil_1696462	5	116	67/69	97	1e-24	464638061	464638129
sil_1090748	5	125	69/69	100	3e-27	464671577	464671509
sil_2275994	5	120	68/69	99	1e-25	467370127	467370059
sil_3384639	5	113	67/69	97	2e-23	467370127	467370061
sil_1138786	5	120	68/69	99	1e-25	469268103	469268035
sil_982315	5	125	69/69	100	3e-27	470995869	470995937
SNP_2278040	5	120	68/69	99	1e-25	471467232	471467300
SNP_1095481	5	125	69/69	100	3e-27	471467235	471467167
SNP_1116958	5	116	67/69	97	1e-24	471476103	471476171
sil_4008653	5	114	66/68	97	5e-24	471713957	471713890
SNP_1129821	5	116	67/69	97	1e-24	472703802	472703734	5	88.17
sil_4010055	5	120	68/69	99	1e-25	473304646	473304578
SNP_1096787	5	120	68/69	99	1e-25	473308567	473308499	5	89.27
SNP_1364455	5	125	69/69	100	3e-27	473321250	473321318
sil_982074	5	125	69/69	100	3e-27	473613832	473613764
SNP_3575054	5	114	66/68	97	5e-24	473634448	473634515
sil_1200343	5	125	69/69	100	3e-27	474335480	474335548
SNP_1219817	5	125	69/69	100	3e-27	475265183	475265251
sil_1259170	5	116	67/69	97	1e-24	476003175	476003243
sil_2327838	5	125	69/69	100	3e-27	476114193	476114125
sil_1072366	5	125	69/69	100	3e-27	476454706	476454638
sil_1217186	5	125	69/69	100	3e-27	476461009	476460941
sil_2326504	5	125	69/69	100	3e-27	476464207	476464275
sil_1102024	5	125	69/69	100	3e-27	476602391	476602323
sil_978303	5	123	68/68	100	1e-26	477701768	477701701
sil_2289328	5	125	69/69	100	3e-27	477809074	477809006
SNP_4542295	5	125	69/69	100	3e-27	479047706	479047774	5	93.99
sil_2333777	5	125	69/69	100	3e-27	488263964	488263896
SNP_998347	5	125	69/69	100	3e-27	491380946	491380878
sil_3575607	5	118	67/68	99	4e-25	491711660	491711727
sil_1058073	5	125	69/69	100	3e-27	493831127	493831059
sil_1026404	5	125	69/69	100	3e-27	496491959	496492027
sil_3575762	5	116	67/69	97	1e-24	497697881	497697813
sil_3953456	5	125	69/69	100	3e-27	502592773	502592841
sil_1038447	5	125	69/69	100	3e-27	503281097	503281165
sil_1071833	5	125	69/69	100	3e-27	503533117	503533049
sil_1035655	5	125	69/69	100	3e-27	504765264	504765196
sil_1064397	5	125	69/69	100	3e-27	504773244	504773312
sil_5001862	5	116	67/69	97	1e-24	505421457	505421389
SNP_2295110	5	123	68/68	100	1e-26	506153743	506153676
SNP_1219166	5	120	68/69	99	1e-25	509723775	509723707
SNP_100006772	5	125	69/69	100	3e-27	510990768	510990700
sil_5007069	5	114	66/68	97	5e-24	513874804	513874737
sil_5003492	5	116	67/69	97	1e-24	514047838	514047770
sil_1122127	5	125	69/69	100	3e-27	520660921	520660989
SNP_999421	5	125	69/69	100	3e-27	521768817	521768885	5	112.21
sil_1076069	5	125	69/69	100	3e-27	522153959	522154027
SNP_1126081	5	125	69/69	100	3e-27	528276557	528276489	5	118.38
SNP_1239323	5	125	69/69	100	3e-27	530071176	530071244	5	118.94
SNP_1306533	5	125	69/69	100	3e-27	535240568	535240500	5	123.16
sil_3572280	5	116	67/69	97	1e-24	535524418	535524486
sil_1216407	5	125	69/69	100	3e-27	537643924	537643856
SNP_979078	5	125	69/69	100	3e-27	541364702	541364770	5	127.36
sil_1049325	5	125	69/69	100	3e-27	543917848	543917780
SNP_1208307	5	125	69/69	100	3e-27	544461734	544461802
SNP_1100749	5	125	69/69	100	3e-27	544582790	544582722
sil_2278596	5	125	69/69	100	3e-27	546925903	546925971
sil_1287184	5	120	68/69	99	1e-25	547018565	547018633
sil_1023493	5	125	69/69	100	3e-27	548988047	548988115
SNP_100112243	5	118	67/68	99	4e-25	549193964	549194031
SNP_1859943	5	120	68/69	99	1e-25	549276756	549276688
sil_988741	5	120	68/69	99	1e-25	549351283	549351351
sil_1018217	5	116	67/69	97	1e-24	551446712	551446644
sil_987857	5	125	69/69	100	3e-27	552057660	552057728
sil_5004495	5	125	69/69	100	3e-27	552071095	552071027
SNP_1136198	5	125	69/69	100	3e-27	552276102	552276170
sil_1008777	5	120	68/69	99	1e-25	552314865	552314797
sil_4997111	5	114	66/68	97	5e-24	553074766	553074833
sil_1132444	5	125	69/69	100	3e-27	554202742	554202674
sil_1321658	5	120	68/69	99	1e-25	554999159	554999227
sil_5003435	5	120	68/69	99	1e-25	555638644	555638712
sil_1095345	5	125	69/69	100	3e-27	555989261	555989329
sil_1261413	5	125	69/69	100	3e-27	557328598	557328530
SNP_1066550	5	125	69/69	100	3e-27	558543809	558543877	5	138.14
sil_3573791	5	116	67/69	97	1e-24	558943101	558943033
sil_5007910	5	120	68/69	99	1e-25	559098082	559098150
SNP_1247729	5	125	69/69	100	3e-27	560229917	560229849	5	139.9
sil_1062335	5	125	69/69	100	3e-27	565671380	565671312
sil_992301	5	120	68/69	99	1e-25	567120979	567121047
SNP_1864512	5	125	69/69	100	3e-27	568890469	568890537	5	145.53
sil_1091303	5	125	69/69	100	3e-27	569161811	569161743
SNP_1077102	5	125	69/69	100	3e-27	569999729	569999797
sil_982130	5	116	67/69	97	1e-24	570016083	570016151
sil_1110787	5	123	68/68	100	1e-26	572372110	572372043
sil_3570615	5	116	67/69	97	1e-24	572842134	572842066
sil_4997740	5	125	69/69	100	3e-27	573608652	573608584
sil_1099514	5	125	69/69	100	3e-27	573789356	573789424
SNP_1052928	5	125	69/69	100	3e-27	575209731	575209663
sil_3573268	5	113	67/69	97	2e-23	575328144	575328077
SNP_2247444	5	125	69/69	100	3e-27	575609583	575609515	5	150.6
sil_1072802	5	125	69/69	100	3e-27	575659343	575659411
SNP_989223	5	125	69/69	100	3e-27	576584512	576584444	5	151.12
SNP_990091	5	125	69/69	100	3e-27	576950657	576950589
sil_5002665	5	113	67/69	97	2e-23	578215657	578215589
SNP_100007414	5	116	67/69	97	1e-24	578695046	578694978
sil_4996906	5	120	68/69	99	1e-25	579876376	579876308
sil_4999112	5	123	68/68	100	1e-26	582552038	582551971
sil_1208613	5	125	69/69	100	3e-27	584821637	584821705
sil_1395299	5	125	69/69	100	3e-27	590452502	590452434
SNP_1216419	5	125	69/69	100	3e-27	591141907	591141975	5	161.78
sil_1090528	5	125	69/69	100	3e-27	591465411	591465479
sil_1215828	5	116	68/69	99	1e-24	592515889	592515956
SNP_100019180	5	116	67/69	97	1e-24	596465087	596465155
sil_1099467	5	125	69/69	100	3e-27	598526240	598526172
sil_1079096	5	125	69/69	100	3e-27	599473352	599473420
SNP_1863143	5	125	69/69	100	3e-27	601976464	601976532
sil_1668255	5	125	69/69	100	3e-27	605696524	605696456
sil_5006717	5	125	69/69	100	3e-27	605801383	605801451
sil_1017471	5	125	69/69	100	3e-27	606397858	606397926
SNP_3572030	5	113	67/69	97	2e-23	608344313	608344380	5	179.44
SNP_1031304	5	125	69/69	100	3e-27	611547202	611547270	5	180.9
sil_1205866	5	125	69/69	100	3e-27	613471749	613471681
SNP_982042	5	125	69/69	100	3e-27	613742840	613742908	5	183.46
sil_3020533	5	125	69/69	100	3e-27	614928101	614928169
sil_1031271	5	125	69/69	100	3e-27	616146756	616146824
sil_2275454	5	125	69/69	100	3e-27	618306919	618306851
sil_4998082	5	123	68/68	100	1e-26	619099407	619099340
sil_1697250	5	120	68/69	99	1e-25	619899714	619899782
sil_1742668	5	116	67/69	97	1e-24	621177654	621177586
sil_1009647	5	125	69/69	100	3e-27	625683076	625683144
sil_5002980	5	120	68/69	99	1e-25	625700295	625700227
SNP_1220275	5	125	69/69	100	3e-27	625713309	625713377	5	190.61
sil_1066996	5	125	69/69	100	3e-27	626192756	626192688
sil_4993924	5	120	68/69	99	1e-25	626607294	626607226
sil_4996665	5	116	67/69	97	1e-24	627785983	627785915
sil_5001923	5	125	69/69	100	3e-27	629251533	629251601
SNP_1103318	5	125	69/69	100	3e-27	634078847	634078915
SNP_1218447	5	125	69/69	100	3e-27	636306187	636306255
sil_4998457	5	118	67/68	99	4e-25	648950144	648950211
SNP_2258868	5	125	69/69	100	3e-27	650284991	650285059
sil_2275695	5	125	69/69	100	3e-27	651526386	651526318
sil_995322	5	125	69/69	100	3e-27	651588620	651588688
sil_2276308	5	125	69/69	100	3e-27	651850478	651850546
sil_2289208	5	125	69/69	100	3e-27	653674207	653674275
sil_2276870	5	125	69/69	100	3e-27	657076089	657076021
SNP_1091215	5	125	69/69	100	3e-27	657205806	657205738
sil_5003494	5	118	67/68	99	4e-25	658596560	658596627
sil_5002560	5	113	67/69	97	2e-23	658803845	658803912
sil_4995773	5	118	67/68	99	4e-25	659529062	659528995
sil_1127879	5	125	69/69	100	3e-27	659720753	659720821
sil_3959928	5	125	69/69	100	3e-27	659721635	659721703
sil_2276058	5	125	69/69	100	3e-27	659841627	659841559
SNP_3574466	5	120	68/69	99	1e-25	663102316	663102248	5	214.27
sil_2269391	5	120	68/69	99	1e-25	663769525	663769593
SNP_1098619	5	125	69/69	100	3e-27	664263085	664263017	5	217.23
SNP_1059801	5	125	69/69	100	3e-27	664265259	664265327	5	217.91
SNP_1025773	5	120	68/69	99	1e-25	665609700	665609768	5	218.9
sil_2247447	5	125	69/69	100	3e-27	665892637	665892705
SNP_4733944	5	125	69/69	100	3e-27	666656110	666656042	5	222.13
sil_4994944	5	125	69/69	100	3e-27	672997055	672997123
SNP_2243250	5	125	69/69	100	3e-27	673836816	673836748	5	227.74
sil_1112114	5	125	69/69	100	3e-27	674066304	674066236
sil_1106001	5	125	69/69	100	3e-27	678931253	678931321
sil_1222211	5	125	69/69	100	3e-27	679368585	679368517
sil_1228740	5	118	67/68	99	4e-25	680669734	680669667
sil_5003184	5	120	68/69	99	1e-25	681136987	681137055
sil_5007269	5	120	68/69	99	1e-25	681136987	681137055
sil_1213432	5	125	69/69	100	3e-27	681373290	681373358
SNP_100002604	5	123	68/68	100	1e-26	681870780	681870847
SNP_1208156	5	120	68/69	99	1e-25	683133122	683133190	5	238.38
sil_1071896	5	125	69/69	100	3e-27	685580842	685580910
sil_1122236	5	125	69/69	100	3e-27	686095861	686095793
SNP_100113029	5	116	67/69	97	1e-24	687364971	687364903
sil_2278841	5	120	68/69	99	1e-25	688665971	688666039
sil_978882	5	125	69/69	100	3e-27	688937101	688937033
SNP_2276062	5	125	69/69	100	3e-27	689644932	689644864	5	245.1
SNP_1275146	5	125	69/69	100	3e-27	690553519	690553451
sil_2252001	5	125	69/69	100	3e-27	690840536	690840604
sil_983378	5	125	69/69	100	3e-27	690845593	690845661
sil_999526	5	120	68/69	99	1e-25	690962642	690962710
SNP_1189263	5	125	69/69	100	3e-27	691403074	691403006
sil_1098524	5	125	69/69	100	3e-27	695356877	695356945
SNP_1015952	5	125	69/69	100	3e-27	695862517	695862585	5	248.88
SNP_1063952	5	125	69/69	100	3e-27	696837292	696837360	5	248.49
sil_979440	5	125	69/69	100	3e-27	700176515	700176447
SNP_1219555	5	120	68/69	99	1e-25	700449620	700449688
sil_3573817	5	116	67/69	97	1e-24	700857952	700857884
sil_3958111	5	116	67/69	97	1e-24	701074712	701074644
SNP_1111856	5	125	69/69	100	3e-27	702846792	702846724
SNP_994016	5	125	69/69	100	3e-27	702997082	702997150	5	253.46
SNP_1233988	5	125	69/69	100	3e-27	704519293	704519361
SNP_1116239	5	125	69/69	100	3e-27	704972973	704972905
sil_2258035	5	120	68/69	99	1e-25	705495363	705495431
sil_1156906	5	125	69/69	100	3e-27	706049568	706049636
sil_4009833	5	125	69/69	100	3e-27	706547680	706547748
SNP_1229306	5	125	69/69	100	3e-27	706654247	706654315	5	262.89
sil_1721373	5	120	68/69	99	1e-25	706896385	706896317
sil_5003451	5	125	69/69	100	3e-27	707822426	707822494
SNP_1126999	5	125	69/69	100	3e-27	708080534	708080602
sil_1121262	5	123	68/68	100	1e-26	708527100	708527167
sil_4996952	5	116	68/69	99	1e-24	708689169	708689236
sil_991241	5	125	69/69	100	3e-27	708794924	708794856
sil_5010327	6	114	66/68	97	5e-24	945013	945080
SNP_995648	6	125	69/69	100	3e-27	1031159	1031227
SNP_1016516	6	116	67/69	97	1e-24	1033222	1033154
sil_1722601	6	125	69/69	100	3e-27	1756531	1756599
sil_2265444	6	125	69/69	100	3e-27	1757315	1757383
sil_1152962	6	120	68/69	99	1e-25	1757505	1757437
SNP_1211029	6	125	69/69	100	3e-27	2054971	2054903	6	6.2
SNP_1386326	6	120	68/69	99	1e-25	2273903	2273835	6	6
sil_1694858	6	120	68/69	99	1e-25	2408370	2408302
sil_1133160	6	120	68/69	99	1e-25	2409514	2409582
sil_5006940	6	116	67/69	97	1e-24	3359495	3359563
sil_1025731	6	125	69/69	100	3e-27	3705897	3705965
sil_1255970	6	125	69/69	100	3e-27	4711874	4711942
sil_1108287	6	125	69/69	100	3e-27	5071716	5071648
sil_3021143	6	116	67/69	97	1e-24	5129073	5129141
sil_4997523	6	116	68/69	99	1e-24	5129073	5129140
sil_1122100	6	125	69/69	100	3e-27	5233682	5233750
sil_1035439	6	125	69/69	100	3e-27	5480066	5480134
SNP_2260971	6	125	69/69	100	3e-27	6562902	6562834	6	3.13
SNP_2303495	6	116	67/69	97	1e-24	6826632	6826564	6	12.02
sil_3935624	6	120	68/69	99	1e-25	7224145	7224213
sil_3945522	6	120	68/69	99	1e-25	7224145	7224213
sil_3534087	6	118	67/68	99	4e-25	8170912	8170979
sil_2265552	6	125	69/69	100	3e-27	8699773	8699705
SNP_100019470	6	125	69/69	100	3e-27	9049541	9049609
sil_3950912	6	118	67/68	99	4e-25	9336459	9336526
sil_3573922	6	111	66/68	97	6e-23	10137214	10137147
sil_1234897	6	116	67/69	97	1e-24	10383901	10383969
sil_1363307	6	120	68/69	99	1e-25	11114968	11114900
sil_1096778	6	120	68/69	99	1e-25	11590808	11590740
SNP_1861386	6	120	68/69	99	1e-25	12263133	12263201
sil_1144727	6	123	68/68	100	1e-26	12413132	12413199
SNP_1094938	6	120	68/69	99	1e-25	12881789	12881721
sil_1132002	6	116	68/69	99	1e-24	13439854	13439787
sil_4997054	6	120	68/69	99	1e-25	13685870	13685938
sil_2260040	6	125	69/69	100	3e-27	13786995	13786927
sil_1091666	6	125	69/69	100	3e-27	13815254	13815322
SNP_996571	6	120	68/69	99	1e-25	14302393	14302461	6	30.81
sil_1267875	6	125	69/69	100	3e-27	14383386	14383454
SNP_1116139	6	116	67/69	97	1e-24	14405805	14405737
sil_1108448	6	120	68/69	99	1e-25	14493318	14493386
sil_5004084	6	125	69/69	100	3e-27	14513528	14513596
sil_1724617	6	125	69/69	100	3e-27	15319063	15318995
sil_2278092	6	125	69/69	100	3e-27	15320550	15320482
sil_1309342	6	125	69/69	100	3e-27	15365299	15365367
sil_1267982	6	125	69/69	100	3e-27	15366090	15366022
sil_4394247	6	125	69/69	100	3e-27	15628394	15628326
SNP_4394247	6	125	69/69	100	3e-27	15628394	15628326
sil_1089263	6	120	68/69	99	1e-25	15647858	15647790
sil_1204226	6	118	67/68	99	4e-25	15685295	15685362
sil_1860260	6	120	68/69	99	1e-25	15685590	15685522
SNP_1204147	6	125	69/69	100	3e-27	15701440	15701372	6	32.32
sil_2261008	6	120	68/69	99	1e-25	15864621	15864553
sil_3958025	6	120	68/69	99	1e-25	15865937	15866005
sil_1207102	6	125	69/69	100	3e-27	15878159	15878227
SNP_990620	6	125	69/69	100	3e-27	15913428	15913496
sil_1041418	6	125	69/69	100	3e-27	15943566	15943498
sil_1086636	6	116	67/69	97	1e-24	16338585	16338517
sil_4994440	6	120	68/69	99	1e-25	16383111	16383179
sil_1244845	6	120	68/69	99	1e-25	16462090	16462158
SNP_1327288	6	125	69/69	100	3e-27	16462313	16462245
sil_1010734	6	123	68/68	100	1e-26	16615972	16615905
SNP_1089683	6	125	69/69	100	3e-27	17540838	17540770	6	35.28
sil_978691	6	123	68/68	100	1e-26	17587956	17588023
sil_3026051	6	120	68/69	99	1e-25	17904029	17903961
sil_1056051	6	125	69/69	100	3e-27	17921859	17921927
SNP_1071958	6	125	69/69	100	3e-27	17942894	17942962	6	37.87
sil_1262772	6	116	67/69	97	1e-24	18098663	18098731
sil_5001974	6	120	68/69	99	1e-25	18936628	18936560
SNP_1229601	6	125	69/69	100	3e-27	19155299	19155367
SNP_1098689	6	120	68/69	99	1e-25	19779802	19779870
sil_1197431	6	125	69/69	100	3e-27	20142482	20142550
SNP_1188124	6	120	68/69	99	1e-25	20254530	20254462	6	41.09
sil_1254247	6	116	67/69	97	1e-24	20335400	20335468
sil_5009703	6	120	68/69	99	1e-25	20335400	20335468
SNP_1288406	6	125	69/69	100	3e-27	20495412	20495480
sil_985430	6	120	68/69	99	1e-25	20826590	20826658
sil_1111943	6	125	69/69	100	3e-27	21059107	21059039
sil_5008052	6	125	69/69	100	3e-27	21228121	21228189
sil_1138074	6	125	69/69	100	3e-27	21563083	21563151
sil_1094491	6	125	69/69	100	3e-27	21564299	21564231
SNP_1112587	6	125	69/69	100	3e-27	21713119	21713051
sil_1129308	6	125	69/69	100	3e-27	21719448	21719380
sil_1209458	6	125	69/69	100	3e-27	21813149	21813217
sil_1228728	6	120	68/69	99	1e-25	22029252	22029184
SNP_1084345	6	125	69/69	100	3e-27	22186473	22186541
SNP_1234236	6	125	69/69	100	3e-27	22186476	22186408
sil_1132843	6	123	68/68	100	1e-26	23603339	23603406
sil_1136271	6	116	67/69	97	1e-24	24030276	24030344
sil_1296123	6	114	66/68	97	5e-24	25106440	25106373
sil_3575693	6	125	69/69	100	3e-27	25706107	25706039
sil_3572612	6	116	67/69	97	1e-24	26293880	26293948
sil_1112250	6	120	68/69	99	1e-25	27020318	27020250
sil_1105315	6	125	69/69	100	3e-27	29805832	29805900
sil_1021322	6	120	68/69	99	1e-25	29885470	29885538
sil_1091853	6	125	69/69	100	3e-27	29885473	29885405
SNP_1281433	6	125	69/69	100	3e-27	30036184	30036116
SNP_1003196	6	123	68/68	100	1e-26	30773573	30773640
sil_1138882	6	116	67/69	97	1e-24	30801524	30801456
SNP_1326360	6	125	69/69	100	3e-27	36254061	36254129
sil_1291909	6	125	69/69	100	3e-27	36818717	36818785
sil_1366438	6	114	66/68	97	5e-24	39488821	39488754
sil_5010611	6	116	67/69	97	1e-24	47080026	47080094
sil_1070716	6	125	69/69	100	3e-27	48049728	48049796
sil_991456	6	120	68/69	99	1e-25	49655671	49655739
sil_1103499	6	125	69/69	100	3e-27	49768458	49768390
SNP_977191	6	125	69/69	100	3e-27	50112723	50112655
sil_4997711	6	118	67/68	99	4e-25	51241456	51241389
sil_1104964	6	125	69/69	100	3e-27	51398238	51398170
SNP_100004116	6	125	69/69	100	3e-27	51905389	51905457
sil_987254	6	125	69/69	100	3e-27	51905480	51905548
sil_1156253	6	125	69/69	100	3e-27	51944793	51944861
SNP_100003803	6	116	68/69	99	1e-24	54941762	54941695
sil_1001587	6	125	69/69	100	3e-27	58591277	58591209
sil_1281718	6	125	69/69	100	3e-27	61523133	61523065
sil_1770269	6	125	69/69	100	3e-27	69371334	69371402
SNP_1194474	6	125	69/69	100	3e-27	74246092	74246024	6	71.98
SNP_1106874	6	125	69/69	100	3e-27	74320698	74320766	6	73.16
SNP_1228642	6	125	69/69	100	3e-27	74845500	74845568
SNP_100035306	6	120	68/69	99	1e-25	81308856	81308924
sil_1056946	6	114	66/68	97	5e-24	83253290	83253223
SNP_100017297	6	116	67/69	97	1e-24	87540585	87540517
sil_1045618	6	125	69/69	100	3e-27	88591434	88591366
sil_5010514	6	114	66/68	97	5e-24	89297625	89297558
SNP_1029556	6	125	69/69	100	3e-27	89968393	89968325	6	73.63
sil_1065650	6	125	69/69	100	3e-27	90749662	90749594
sil_1862824	6	125	69/69	100	3e-27	91428005	91427937
sil_1097706	6	125	69/69	100	3e-27	91869334	91869402
sil_1236192	6	125	69/69	100	3e-27	94273314	94273382
sil_1124515	6	125	69/69	100	3e-27	95790812	95790744
sil_1093357	6	125	69/69	100	3e-27	96146840	96146908
sil_4999621	6	123	68/68	100	1e-26	96813694	96813761
sil_1143366	6	120	68/69	99	1e-25	99129276	99129208
sil_4997764	6	116	67/69	97	1e-24	99129276	99129208
sil_1237562	6	125	69/69	100	3e-27	99795230	99795298
sil_1233169	6	125	69/69	100	3e-27	99795471	99795539
sil_4996521	6	116	67/69	97	1e-24	100087448	100087380
sil_1059926	6	125	69/69	100	3e-27	101562607	101562539
SNP_100020976	6	125	69/69	100	3e-27	103264263	103264195
SNP_100015587	6	114	66/68	97	5e-24	103265095	103265162
SNP_100005603	6	125	69/69	100	3e-27	103265908	103265976
sil_1220449	6	116	67/69	97	1e-24	107214709	107214641
SNP_3573042	6	118	67/68	99	4e-25	124720531	124720598	6	87.57
SNP_100027205	6	123	68/68	100	1e-26	126916943	126917010
sil_5007314	6	116	67/69	97	1e-24	133799685	133799617
SNP_1048579	6	125	69/69	100	3e-27	155255378	155255446
sil_1045582	6	125	69/69	100	3e-27	155518370	155518302
SNP_3938664	6	125	69/69	100	3e-27	158050732	158050664
sil_2292936	6	125	69/69	100	3e-27	162728973	162729041
sil_1273825	6	120	68/69	99	1e-25	162728976	162728908
sil_2254698	6	120	68/69	99	1e-25	162966148	162966216
sil_4705848	6	125	69/69	100	3e-27	171359517	171359585
sil_1041496	6	125	69/69	100	3e-27	172133746	172133814
SNP_1184622	6	125	69/69	100	3e-27	173434505	173434573	6	89.09
sil_1089237	6	125	69/69	100	3e-27	181013177	181013109
sil_5009798	6	114	66/68	97	5e-24	182494969	182494902
SNP_1125214	6	125	69/69	100	3e-27	188251504	188251436	6	89.09
sil_1764545	6	125	69/69	100	3e-27	191235195	191235127
SNP_2293773	6	125	69/69	100	3e-27	198092158	198092226	6	89.09
sil_2275883	6	125	69/69	100	3e-27	206269445	206269377
SNP_1103398	6	125	69/69	100	3e-27	207828194	207828262
SNP_100007691	6	116	67/69	97	1e-24	252868555	252868487
SNP_100005063	6	116	67/69	97	1e-24	258628866	258628934
sil_1697218	6	125	69/69	100	3e-27	260423085	260423153
sil_1093523	6	125	69/69	100	3e-27	271821494	271821426
sil_5004863	6	116	67/69	97	1e-24	286810722	286810790
sil_5002445	6	116	67/69	97	1e-24	317918773	317918841
sil_3573276	6	116	67/69	97	1e-24	317918776	317918708
sil_1036865	6	125	69/69	100	3e-27	323463430	323463498
sil_3575571	6	116	67/69	97	1e-24	331145850	331145918
sil_1765274	6	120	68/69	99	1e-25	334576825	334576893
SNP_100004302	6	120	68/69	99	1e-25	340919990	340919922
sil_5007754	6	120	68/69	99	1e-25	346186240	346186172
sil_3570322	6	118	67/68	99	4e-25	348209337	348209270
sil_3572471	6	120	68/69	99	1e-25	352519400	352519332
sil_1863360	6	125	69/69	100	3e-27	362276733	362276801
SNP_1215556	6	125	69/69	100	3e-27	363517081	363517149
sil_3572498	6	120	68/69	99	1e-25	377543290	377543358
sil_3571064	6	116	67/69	97	1e-24	383853354	383853286
sil_2281875	6	125	69/69	100	3e-27	385753222	385753290
SNP_1109699	6	125	69/69	100	3e-27	399722881	399722813
SNP_1861102	6	125	69/69	100	3e-27	400180027	400180095	6	89.09
sil_4999464	6	125	69/69	100	3e-27	406235511	406235579
sil_5005521	6	120	68/69	99	1e-25	406235514	406235446
sil_4406711	6	120	68/69	99	1e-25	407205757	407205689
SNP_1099507	6	125	69/69	100	3e-27	425657331	425657399
SNP_100004922	6	116	67/69	97	1e-24	445643578	445643510
sil_1007368	6	120	68/69	99	1e-25	461434011	461433943
SNP_1202253	6	125	69/69	100	3e-27	468257462	468257530	6	100.24
sil_1202048	6	116	67/69	97	1e-24	472346657	472346725
sil_1220352	6	125	69/69	100	3e-27	472346657	472346725
sil_1283361	6	118	67/68	99	4e-25	483304938	483305005
SNP_2260657	6	125	69/69	100	3e-27	498954565	498954497
sil_1080814	6	123	68/68	100	1e-26	507731669	507731602
sil_2276577	6	125	69/69	100	3e-27	517880456	517880524
SNP_1216013	6	125	69/69	100	3e-27	522639554	522639486
SNP_1156192	6	125	69/69	100	3e-27	522743274	522743342
sil_1096506	6	120	68/69	99	1e-25	530215942	530215874
sil_1032104	6	125	69/69	100	3e-27	542733123	542733055
SNP_1071268	6	125	69/69	100	3e-27	552827212	552827144
SNP_1079278	6	125	69/69	100	3e-27	553923669	553923601	6	114.68
SNP_100016943	6	116	67/69	97	1e-24	554855754	554855822
sil_2294578	6	125	69/69	100	3e-27	556086566	556086634
SNP_1054186	6	125	69/69	100	3e-27	556762619	556762687
sil_5003571	6	125	69/69	100	3e-27	558023980	558023912
sil_3571793	6	125	69/69	100	3e-27	563264437	563264369
sil_1254023	6	125	69/69	100	3e-27	564511816	564511884
sil_1207638	6	125	69/69	100	3e-27	564522889	564522821
sil_5004003	6	113	67/69	97	2e-23	564522889	564522823
sil_5009217	6	114	66/68	97	5e-24	571493426	571493493
sil_4994928	6	114	66/68	97	5e-24	572312243	572312310
sil_1075618	6	125	69/69	100	3e-27	574385715	574385647
SNP_1146074	6	125	69/69	100	3e-27	578895038	578895106
sil_1172380	6	116	67/69	97	1e-24	580281149	580281217
SNP_991671	6	125	69/69	100	3e-27	582511291	582511223
sil_1063130	6	125	69/69	100	3e-27	583270800	583270732
SNP_1210640	6	125	69/69	100	3e-27	584687564	584687496
sil_3572419	6	120	68/69	99	1e-25	584766149	584766217
sil_1050824	6	125	69/69	100	3e-27	585469106	585469174
sil_3572989	6	120	68/69	99	1e-25	585787274	585787342
sil_5009137	6	120	68/69	99	1e-25	586364623	586364691
SNP_1067593	6	125	69/69	100	3e-27	587565068	587565000	6	149.29
sil_3570471	6	116	67/69	97	1e-24	587760969	587761037
SNP_2276045	6	125	69/69	100	3e-27	587968255	587968187	6	149.29
SNP_1151970	6	125	69/69	100	3e-27	591466125	591466057
SNP_1088932	6	125	69/69	100	3e-27	592514929	592514861	6	153.84
SNP_100003559	6	120	68/69	99	1e-25	592571407	592571475
sil_3572448	6	120	68/69	99	1e-25	592602153	592602085
sil_3571274	6	116	68/69	99	1e-24	592815566	592815498
SNP_100008238	6	120	68/69	99	1e-25	593562016	593561948
SNP_1088712	6	125	69/69	100	3e-27	593787612	593787680
sil_3573064	6	116	67/69	97	1e-24	593841585	593841517
sil_5003891	6	116	67/69	97	1e-24	593927599	593927531
sil_1087987	6	125	69/69	100	3e-27	595444852	595444920
sil_1125563	6	125	69/69	100	3e-27	595578922	595578990
sil_1696328	6	125	69/69	100	3e-27	595669319	595669387
sil_1093609	6	125	69/69	100	3e-27	596658016	596658084
SNP_1717050	6	120	68/69	99	1e-25	596890298	596890230	6	162.82
SNP_2256073	6	125	69/69	100	3e-27	597341506	597341438	6	163.32
SNP_2253216	6	125	69/69	100	3e-27	597939768	597939700
SNP_100015584	6	116	67/69	97	1e-24	598810626	598810558
sil_1017656	6	116	67/69	97	1e-24	599261582	599261650
sil_1212462	6	118	67/68	99	4e-25	600392738	600392805
sil_2293463	6	116	67/69	97	1e-24	600460584	600460652
sil_3570716	6	118	67/68	99	4e-25	600528074	600528007
sil_3570974	6	111	66/68	97	6e-23	600528074	600528008
sil_1238407	6	125	69/69	100	3e-27	601032565	601032497
sil_1278415	6	125	69/69	100	3e-27	601254708	601254776
sil_1208362	6	125	69/69	100	3e-27	601473661	601473729
sil_1137974	6	120	68/69	99	1e-25	602579334	602579402
SNP_1190777	6	125	69/69	100	3e-27	603182559	603182491
SNP_1091284	6	125	69/69	100	3e-27	603365751	603365683
sil_1103888	6	125	69/69	100	3e-27	603785427	603785495
SNP_1104890	6	125	69/69	100	3e-27	604578550	604578618
sil_1862957	6	116	67/69	97	1e-24	605151507	605151575
sil_1273271	6	125	69/69	100	3e-27	606436489	606436557
sil_1100599	6	125	69/69	100	3e-27	606623156	606623088
SNP_100017576	6	125	69/69	100	3e-27	607408663	607408595
sil_1124675	6	116	67/69	97	1e-24	608151460	608151528
sil_1041557	6	125	69/69	100	3e-27	608153131	608153063
sil_1048557	6	125	69/69	100	3e-27	608220754	608220822
SNP_1106558	6	125	69/69	100	3e-27	608278291	608278359
sil_1111100	6	120	68/69	99	1e-25	608571120	608571188
sil_1022129	6	125	69/69	100	3e-27	608662081	608662013
SNP_1107827	6	125	69/69	100	3e-27	608859040	608858972
sil_1113967	6	125	69/69	100	3e-27	609044768	609044700
sil_5005806	6	116	68/69	99	1e-24	609044768	609044701
sil_1233521	6	125	69/69	100	3e-27	609045699	609045631
sil_1081411	6	125	69/69	100	3e-27	609088461	609088393
sil_4998206	6	120	68/69	99	1e-25	609088659	609088591
SNP_1059709	6	125	69/69	100	3e-27	609105695	609105763
SNP_2277475	6	125	69/69	100	3e-27	609107137	609107205
SNP_4262058	6	125	69/69	100	3e-27	609163473	609163405
sil_1067560	6	125	69/69	100	3e-27	609382832	609382900
sil_2279316	6	125	69/69	100	3e-27	609383023	609382955
SNP_1026973	6	125	69/69	100	3e-27	609479407	609479339	6	185.36
SNP_980448	6	125	69/69	100	3e-27	609480220	609480288	6	185.36
sil_2284605	6	125	69/69	100	3e-27	609481020	609480952
sil_1228176	6	125	69/69	100	3e-27	609573351	609573283
sil_1250993	6	125	69/69	100	3e-27	609827986	609827918
sil_1124961	6	125	69/69	100	3e-27	610124504	610124572
sil_4412191	6	113	67/69	97	2e-23	610211140	610211207
sil_1114464	6	125	69/69	100	3e-27	610267685	610267753
sil_1125325	6	120	68/69	99	1e-25	610285940	610286008
sil_1299160	6	125	69/69	100	3e-27	610285943	610285875
sil_1065154	6	120	68/69	99	1e-25	610294735	610294803
sil_1105575	6	125	69/69	100	3e-27	610402495	610402427
sil_2279217	6	125	69/69	100	3e-27	610402746	610402678
sil_2257559	6	116	67/69	97	1e-24	610529126	610529194
sil_1211787	6	125	69/69	100	3e-27	610667018	610666950
sil_1031274	6	125	69/69	100	3e-27	610795493	610795561
sil_1043925	6	125	69/69	100	3e-27	610804975	610805043
sil_4004693	6	125	69/69	100	3e-27	610955790	610955722
sil_2278273	6	125	69/69	100	3e-27	610955900	610955968
sil_1202445	6	125	69/69	100	3e-27	611334867	611334935
sil_1215474	6	125	69/69	100	3e-27	611822591	611822523
SNP_2281513	6	120	68/69	99	1e-25	612290726	612290794	6	188.39
sil_1068144	6	125	69/69	100	3e-27	613084980	613084912
sil_1367737	6	125	69/69	100	3e-27	613331945	613331877
SNP_981052	6	125	69/69	100	3e-27	613605354	613605422	6	189.69
sil_1305366	6	125	69/69	100	3e-27	613794168	613794236
sil_1393324	6	125	69/69	100	3e-27	613963035	613963103
sil_1099785	6	125	69/69	100	3e-27	614405583	614405515
SNP_1074151	6	120	68/69	99	1e-25	614448932	614449000
sil_1228431	6	125	69/69	100	3e-27	614479287	614479355
sil_3534213	6	125	69/69	100	3e-27	615303815	615303883
sil_1683634	6	116	67/69	97	1e-24	615462450	615462518
SNP_4260909	6	120	68/69	99	1e-25	615771372	615771304
sil_997658	6	125	69/69	100	3e-27	615968170	615968102
sil_3941546	6	125	69/69	100	3e-27	616113027	616112959
sil_2262518	6	125	69/69	100	3e-27	616118515	616118583
SNP_1127896	6	125	69/69	100	3e-27	616351875	616351807	6	200.35
sil_1722489	6	120	68/69	99	1e-25	617533354	617533286
SNP_2251743	6	120	68/69	99	1e-25	617656968	617657036
sil_1056400	6	125	69/69	100	3e-27	617805849	617805781
sil_1360007	7	125	69/69	100	3e-27	543414	543482
sil_1698253	7	120	68/69	99	1e-25	1274213	1274281
sil_1230481	7	125	69/69	100	3e-27	1274216	1274148
SNP_1249544	7	125	69/69	100	3e-27	1321694	1321762
sil_5004732	7	125	69/69	100	3e-27	1479490	1479558
SNP_100033196	7	118	67/68	99	4e-25	2754919	2754986
sil_1217265	7	125	69/69	100	3e-27	3786665	3786733
sil_1333076	7	125	69/69	100	3e-27	3823640	3823572
SNP_1138131	7	116	67/69	97	1e-24	4013265	4013333
SNP_1220636	7	125	69/69	100	3e-27	4630052	4629984
sil_1074781	7	125	69/69	100	3e-27	6324709	6324641
sil_1107123	7	125	69/69	100	3e-27	6592784	6592852
sil_1740266	7	120	68/69	99	1e-25	6781575	6781507
sil_1007204	7	120	68/69	99	1e-25	7243671	7243603
sil_2253648	7	125	69/69	100	3e-27	7289233	7289165
SNP_1380203	7	125	69/69	100	3e-27	7876370	7876438
sil_2280942	7	120	68/69	99	1e-25	7910643	7910575
sil_2265074	7	120	68/69	99	1e-25	7938825	7938757
sil_1116022	7	120	68/69	99	1e-25	8291548	8291616
sil_1081579	7	125	69/69	100	3e-27	8530345	8530413
SNP_100005836	7	125	69/69	100	3e-27	9735901	9735969
sil_5007074	7	118	67/68	99	4e-25	9824444	9824511
sil_3572742	7	116	67/69	97	1e-24	9825371	9825439
sil_1713867	7	120	68/69	99	1e-25	9997730	9997798
sil_1099312	7	125	69/69	100	3e-27	11984574	11984642
sil_984908	7	125	69/69	100	3e-27	12099978	12100046
sil_1111988	7	125	69/69	100	3e-27	13061330	13061262
sil_1313648	7	120	68/69	99	1e-25	14041957	14041889
sil_1755551	7	116	67/69	97	1e-24	14041957	14041889
sil_1049998	7	125	69/69	100	3e-27	14298044	14297976
SNP_1296903	7	125	69/69	100	3e-27	14343157	14343089	7	15.75
SNP_1333948	7	125	69/69	100	3e-27	14446184	14446252
sil_1143181	7	125	69/69	100	3e-27	16886811	16886743
sil_1280403	7	125	69/69	100	3e-27	17709001	17708933
sil_3571023	7	120	68/69	99	1e-25	18217846	18217778
sil_1237038	7	113	67/69	97	2e-23	18771467	18771400
sil_1398318	7	116	68/69	99	1e-24	18798828	18798895
sil_1261055	7	120	68/69	99	1e-25	19734099	19734031
SNP_1119362	7	125	69/69	100	3e-27	19958953	19958885
sil_1073995	7	120	68/69	99	1e-25	20287507	20287575
SNP_2263800	7	120	68/69	99	1e-25	20436719	20436651
sil_1081679	7	125	69/69	100	3e-27	20582384	20582316
sil_1127215	7	125	69/69	100	3e-27	20678576	20678508
sil_1138207	7	120	68/69	99	1e-25	21261938	21261870
sil_4999742	7	116	67/69	97	1e-24	25038618	25038686
SNP_1090490	7	123	68/68	100	1e-26	25369997	25369930	7	31
sil_1090134	7	125	69/69	100	3e-27	26044219	26044287
sil_1034844	7	120	68/69	99	1e-25	26300998	26301066
sil_984301	7	125	69/69	100	3e-27	26303413	26303345
sil_1111784	7	120	68/69	99	1e-25	26323791	26323859
SNP_100030378	7	120	68/69	99	1e-25	27390108	27390176
sil_1051802	7	125	69/69	100	3e-27	28421865	28421933
SNP_1006817	7	125	69/69	100	3e-27	29105759	29105827	7	33.41
sil_5005687	7	125	69/69	100	3e-27	29106014	29106082
SNP_1217716	7	125	69/69	100	3e-27	30142464	30142532
SNP_100016011	7	120	68/69	99	1e-25	30424282	30424350
sil_1036713	7	120	68/69	99	1e-25	30433973	30434041
sil_5001683	7	120	68/69	99	1e-25	30664536	30664468
SNP_1127899	7	125	69/69	100	3e-27	30810941	30811009	7	35.55
sil_990823	7	116	67/69	97	1e-24	30866007	30866075
SNP_2249319	7	120	68/69	99	1e-25	31433689	31433621	7	34.84
sil_1127434	7	116	67/69	97	1e-24	33086091	33086023
sil_1046384	7	116	67/69	97	1e-24	33090686	33090618
sil_1050007	7	125	69/69	100	3e-27	33972283	33972351
sil_1119767	7	125	69/69	100	3e-27	34106287	34106219
SNP_100002745	7	116	67/69	97	1e-24	34539807	34539875
sil_4995786	7	116	67/69	97	1e-24	37367284	37367216
SNP_1074325	7	125	69/69	100	3e-27	38370232	38370300
SNP_1035836	7	125	69/69	100	3e-27	40103543	40103611	7	46.73
sil_994309	7	113	67/69	97	2e-23	41818199	41818132
SNP_3574217	7	125	69/69	100	3e-27	41877671	41877603
sil_1038318	7	125	69/69	100	3e-27	42921901	42921833
sil_1092824	7	120	68/69	99	1e-25	49159083	49159015
sil_3572985	7	111	66/68	97	6e-23	49159083	49159016
sil_1108608	7	116	67/69	97	1e-24	49486722	49486654
SNP_996562	7	125	69/69	100	3e-27	49905663	49905595	7	53.9
SNP_1130296	7	125	69/69	100	3e-27	51661675	51661607
sil_1253892	7	118	67/68	99	4e-25	51665382	51665315
sil_4996119	7	120	68/69	99	1e-25	54192030	54191962
sil_1109265	7	125	69/69	100	3e-27	54687806	54687738
sil_1056497	7	125	69/69	100	3e-27	55918579	55918511
sil_4999539	7	114	66/68	97	5e-24	55918579	55918512
SNP_1089996	7	125	69/69	100	3e-27	58641523	58641455
sil_1209925	7	125	69/69	100	3e-27	63118004	63117936
SNP_1217703	7	125	69/69	100	3e-27	64488295	64488363
sil_1192447	7	125	69/69	100	3e-27	64608530	64608598
SNP_1085123	7	125	69/69	100	3e-27	64740772	64740704
SNP_1019134	7	125	69/69	100	3e-27	69906996	69906928
SNP_1103958	7	125	69/69	100	3e-27	71155446	71155378
sil_1103538	7	125	69/69	100	3e-27	79335558	79335490
SNP_100008485	7	125	69/69	100	3e-27	79645671	79645739
sil_3575751	7	120	68/69	99	1e-25	83291940	83292008
SNP_2252783	7	120	68/69	99	1e-25	83292738	83292806
SNP_1091684	7	125	69/69	100	3e-27	85082454	85082522	7	82.17
SNP_1204046	7	125	69/69	100	3e-27	85913578	85913510
sil_3961341	7	116	67/69	97	1e-24	87333843	87333911
SNP_1057215	7	125	69/69	100	3e-27	88321067	88320999	7	84.07
sil_1058766	7	125	69/69	100	3e-27	88974742	88974810
SNP_3573440	7	120	68/69	99	1e-25	89835534	89835602
sil_1261462	7	116	67/69	97	1e-24	89975513	89975445
sil_1114034	7	120	68/69	99	1e-25	89976095	89976027
SNP_100006129	7	116	67/69	97	1e-24	90376908	90376840
sil_1228396	7	125	69/69	100	3e-27	92895944	92895876
SNP_2241819	7	125	69/69	100	3e-27	93916790	93916858	7	92.3
sil_1065786	7	125	69/69	100	3e-27	94688903	94688835
sil_4004904	7	125	69/69	100	3e-27	95246293	95246361
sil_2257165	7	120	68/69	99	1e-25	96569587	96569655
SNP_996971	7	125	69/69	100	3e-27	97878327	97878395
SNP_1247998	7	125	69/69	100	3e-27	98731008	98730940	7	93.66
SNP_2325759	7	125	69/69	100	3e-27	99673092	99673024
sil_4994029	7	123	68/68	100	1e-26	102288942	102288875
sil_1088535	7	125	69/69	100	3e-27	106776817	106776749
sil_1104020	7	125	69/69	100	3e-27	106777044	106777112
sil_1094971	7	125	69/69	100	3e-27	106777047	106776979
sil_3573635	7	116	67/69	97	1e-24	106790045	106790113
sil_1228667	7	125	69/69	100	3e-27	106985575	106985507
sil_1294217	7	125	69/69	100	3e-27	107557279	107557211
sil_1126352	7	125	69/69	100	3e-27	108215582	108215650
sil_1240824	7	125	69/69	100	3e-27	108215585	108215517
sil_1285725	7	125	69/69	100	3e-27	113791887	113791819
SNP_980524	7	125	69/69	100	3e-27	115259874	115259942	7	98.17
sil_5003498	7	116	67/69	97	1e-24	115960770	115960838
SNP_1032143	7	120	68/69	99	1e-25	116122839	116122907
SNP_1096346	7	125	69/69	100	3e-27	116872547	116872479
SNP_1138885	7	125	69/69	100	3e-27	117087625	117087693
SNP_100012618	7	116	67/69	97	1e-24	119697666	119697598
SNP_1106213	7	125	69/69	100	3e-27	119702304	119702372
SNP_1070954	7	125	69/69	100	3e-27	121064078	121064146
sil_1763304	7	116	67/69	97	1e-24	122760374	122760442
SNP_100005000	7	116	67/69	97	1e-24	148252033	148251965
SNP_1047332	7	125	69/69	100	3e-27	152084431	152084363
sil_3956697	7	120	68/69	99	1e-25	162764818	162764750
sil_1023690	7	123	68/68	100	1e-26	170613103	170613036
SNP_1061009	7	125	69/69	100	3e-27	171384266	171384198
SNP_1092581	7	120	68/69	99	1e-25	171438982	171438914
sil_1063848	7	125	69/69	100	3e-27	171555861	171555929
sil_989967	7	120	68/69	99	1e-25	174203663	174203731
sil_1167274	7	125	69/69	100	3e-27	177348054	177348122
sil_1031333	7	125	69/69	100	3e-27	183902656	183902724
sil_1027956	7	125	69/69	100	3e-27	189342195	189342263
sil_5002171	7	114	66/68	97	5e-24	195513418	195513351
sil_1407680	7	116	67/69	97	1e-24	195516969	195516901
sil_1057190	7	125	69/69	100	3e-27	198190016	198189948
sil_1115717	7	125	69/69	100	3e-27	218239736	218239804
SNP_100008763	7	120	68/69	99	1e-25	226622519	226622587
sil_1128415	7	123	68/68	100	1e-26	239545089	239545156
sil_5010530	7	120	68/69	99	1e-25	253333202	253333134
sil_1717455	7	125	69/69	100	3e-27	258762931	258762999
sil_1309422	7	116	67/69	97	1e-24	261865656	261865724
sil_988886	7	125	69/69	100	3e-27	270895889	270895957
sil_4994141	7	116	67/69	97	1e-24	290626976	290626908
sil_5009887	7	116	67/69	97	1e-24	302782892	302782960
sil_1051851	7	125	69/69	100	3e-27	308137806	308137874
sil_1409759	7	116	67/69	97	1e-24	310234891	310234823
sil_4997052	7	120	68/69	99	1e-25	330404785	330404717
sil_5004593	7	125	69/69	100	3e-27	373859677	373859609
sil_5010150	7	120	68/69	99	1e-25	382005695	382005763
sil_5008299	7	116	67/69	97	1e-24	398551546	398551478
SNP_3574775	7	116	67/69	97	1e-24	403181342	403181410
SNP_1064063	7	125	69/69	100	3e-27	409876064	409876132
sil_3573759	7	113	67/69	97	2e-23	424018835	424018768
sil_1071409	7	125	69/69	100	3e-27	429173450	429173518
SNP_1306471	7	125	69/69	100	3e-27	430490948	430491016	7	120.12
sil_3575234	7	116	67/69	97	1e-24	432700019	432700087
SNP_1070325	7	125	69/69	100	3e-27	445607351	445607283	7	120.12
sil_4994651	7	118	67/68	99	4e-25	458234240	458234173
sil_3575748	7	116	67/69	97	1e-24	458556205	458556273
SNP_996521	7	125	69/69	100	3e-27	464570003	464570071
sil_1062974	7	125	69/69	100	3e-27	465348556	465348488
SNP_994514	7	120	68/69	99	1e-25	473024188	473024256
sil_1107171	7	125	69/69	100	3e-27	477809339	477809407
sil_980655	7	125	69/69	100	3e-27	477812438	477812506
sil_1046610	7	120	68/69	99	1e-25	484596305	484596373
SNP_1080931	7	125	69/69	100	3e-27	485188388	485188456	7	122.8
SNP_1860014	7	125	69/69	100	3e-27	506792728	506792796
sil_2255021	7	120	68/69	99	1e-25	512765170	512765102
sil_4996349	7	120	68/69	99	1e-25	516511153	516511221
sil_3573368	7	125	69/69	100	3e-27	538246727	538246659
sil_2296776	7	125	69/69	100	3e-27	538819898	538819830
sil_1089918	7	125	69/69	100	3e-27	539851712	539851780
SNP_100011347	7	120	68/69	99	1e-25	540798790	540798858
SNP_100113575	7	116	67/69	97	1e-24	541454865	541454933
SNP_994119	7	125	69/69	100	3e-27	545935056	545935124
sil_1215377	7	125	69/69	100	3e-27	547957196	547957128
sil_2245356	7	120	68/69	99	1e-25	554488565	554488497
sil_5006335	7	116	67/69	97	1e-24	571054862	571054930
sil_5002863	7	120	68/69	99	1e-25	576420531	576420463
SNP_1718109	7	125	69/69	100	3e-27	576883563	576883631
sil_4994501	7	116	67/69	97	1e-24	579923576	579923644
sil_1204762	7	125	69/69	100	3e-27	580629530	580629462
sil_1216236	7	116	67/69	97	1e-24	580629530	580629462
sil_1025414	7	116	67/69	97	1e-24	580632260	580632192
SNP_1145691	7	125	69/69	100	3e-27	580657068	580657000	7	148.77
sil_4996695	7	120	68/69	99	1e-25	581922271	581922203
sil_1116242	7	125	69/69	100	3e-27	592088269	592088337
sil_2244521	7	123	68/68	100	1e-26	592905438	592905371
sil_1409337	7	120	68/69	99	1e-25	593429129	593429197
SNP_2276002	7	125	69/69	100	3e-27	602232934	602233002	7	151.69
SNP_988105	7	125	69/69	100	3e-27	604853085	604853017
sil_2288387	7	120	68/69	99	1e-25	606330946	606331014
sil_3945170	7	125	69/69	100	3e-27	608894673	608894741
sil_1206970	7	125	69/69	100	3e-27	608894676	608894608
SNP_1063345	7	125	69/69	100	3e-27	608921974	608922042
sil_1267032	7	116	67/69	97	1e-24	609379523	609379591
SNP_1408043	7	120	68/69	99	1e-25	609390363	609390295
SNP_100016818	7	116	67/69	97	1e-24	613025434	613025502
sil_1017153	7	120	68/69	99	1e-25	613632091	613632023
SNP_100008723	7	116	67/69	97	1e-24	613725668	613725600
sil_5005351	7	116	67/69	97	1e-24	615469423	615469355
sil_2256628	7	123	68/68	100	1e-26	615495617	615495550
SNP_1019761	7	125	69/69	100	3e-27	618240134	618240202
sil_1014872	7	120	68/69	99	1e-25	618242336	618242404
SNP_1102445	7	125	69/69	100	3e-27	618242599	618242531
SNP_3572864	7	114	66/68	97	5e-24	619036444	619036377
sil_1112648	7	125	69/69	100	3e-27	621564723	621564655
sil_2278336	7	125	69/69	100	3e-27	621566966	621566898
sil_1076323	7	120	68/69	99	1e-25	621582384	621582316
sil_1126877	7	120	68/69	99	1e-25	621755488	621755420
sil_3960420	7	120	68/69	99	1e-25	621856880	621856948
SNP_1031592	7	125	69/69	100	3e-27	623456951	623456883	7	157.78
SNP_1383227	7	120	68/69	99	1e-25	624688094	624688162	7	158.88
SNP_1342225	7	120	68/69	99	1e-25	624961049	624960981	7	157.78
SNP_1096029	7	120	68/69	99	1e-25	625675737	625675805
sil_1282392	7	125	69/69	100	3e-27	625702085	625702153
sil_4007921	7	116	67/69	97	1e-24	627011118	627011186
sil_2288891	7	125	69/69	100	3e-27	628358085	628358153
sil_5002539	7	116	67/69	97	1e-24	628492098	628492030
sil_1060743	7	125	69/69	100	3e-27	634711870	634711938
sil_1020699	7	118	67/68	99	4e-25	634711873	634711806
sil_1007799	7	116	67/69	97	1e-24	635301050	635300982
SNP_1151221	7	125	69/69	100	3e-27	635504361	635504293
SNP_1220699	7	125	69/69	100	3e-27	635688089	635688157	7	166.15
sil_1313511	7	125	69/69	100	3e-27	636113988	636114056
sil_1020441	7	125	69/69	100	3e-27	636230810	636230742
sil_1053933	7	125	69/69	100	3e-27	637948818	637948750
SNP_1040382	7	125	69/69	100	3e-27	639318387	639318319	7	167.01
SNP_1004772	7	125	69/69	100	3e-27	639777967	639777899
sil_1233015	7	125	69/69	100	3e-27	640595151	640595219
SNP_100006250	7	114	66/68	97	5e-24	644132450	644132517
SNP_2275919	7	125	69/69	100	3e-27	644463027	644463095
sil_2302282	7	125	69/69	100	3e-27	645038468	645038536
sil_1074583	7	120	68/69	99	1e-25	645088339	645088271
sil_1229949	7	125	69/69	100	3e-27	646090682	646090750
sil_1861526	7	125	69/69	100	3e-27	648216343	648216411
SNP_2327135	7	125	69/69	100	3e-27	648430550	648430618
sil_4999785	7	116	67/69	97	1e-24	650363437	650363505
sil_3575580	7	120	68/69	99	1e-25	650589043	650588975
sil_2276366	7	125	69/69	100	3e-27	652922144	652922212
sil_1080417	7	125	69/69	100	3e-27	654563941	654564009
sil_4996557	7	114	66/68	97	5e-24	661840376	661840309
sil_3571982	7	116	67/69	97	1e-24	661843208	661843140
sil_1217056	7	125	69/69	100	3e-27	665096031	665095963
SNP_100007022	7	113	67/69	97	2e-23	666212653	666212719
sil_5007691	7	118	67/68	99	4e-25	666655679	666655612
sil_2290282	7	125	69/69	100	3e-27	668256934	668256866
sil_1261774	7	125	69/69	100	3e-27	668309902	668309970
sil_1220229	7	125	69/69	100	3e-27	669329473	669329541
SNP_2294851	7	125	69/69	100	3e-27	669329476	669329408	7	189.45
sil_1212061	7	125	69/69	100	3e-27	669509866	669509934
sil_1021178	7	120	68/69	99	1e-25	670167831	670167899
sil_1017121	7	123	68/68	100	1e-26	670570210	670570143
SNP_1102333	7	125	69/69	100	3e-27	670946082	670946150
SNP_1035374	7	125	69/69	100	3e-27	675231749	675231817
sil_992939	7	125	69/69	100	3e-27	675528026	675528094
sil_4995395	7	114	66/68	97	5e-24	676591721	676591788
sil_3573032	7	120	68/69	99	1e-25	680914909	680914977
sil_1057880	7	125	69/69	100	3e-27	681817821	681817753
SNP_1011781	7	120	68/69	99	1e-25	682531135	682531067
sil_4998776	7	116	67/69	97	1e-24	686244359	686244291
sil_980983	7	125	69/69	100	3e-27	686796018	686796086
sil_2290628	7	125	69/69	100	3e-27	688637828	688637896
sil_2275208	7	123	68/68	100	1e-26	688662840	688662773
sil_5003827	7	116	67/69	97	1e-24	689344060	689343992
sil_1072102	7	120	68/69	99	1e-25	689920071	689920139
sil_1770421	7	116	67/69	97	1e-24	690171820	690171752
sil_1021039	7	120	68/69	99	1e-25	690439229	690439161
sil_1407683	7	114	66/68	97	5e-24	692019589	692019522
SNP_2292191	7	125	69/69	100	3e-27	692313094	692313026
sil_3570553	7	123	68/68	100	1e-26	692762595	692762528
sil_5006068	7	120	68/69	99	1e-25	692922496	692922428
sil_2289299	7	125	69/69	100	3e-27	693406150	693406082
sil_1003626	7	125	69/69	100	3e-27	693638243	693638175
SNP_1290835	7	125	69/69	100	3e-27	694047719	694047787
sil_1217622	7	125	69/69	100	3e-27	694253517	694253585
sil_1379002	7	123	68/68	100	1e-26	694657090	694657157
sil_1127286	7	125	69/69	100	3e-27	694667004	694666936
sil_2289012	7	125	69/69	100	3e-27	695728509	695728577
sil_4996956	7	116	67/69	97	1e-24	696033409	696033341
sil_3575550	7	120	68/69	99	1e-25	696305672	696305604
sil_1018112	7	120	68/69	99	1e-25	696552911	696552843
sil_1043093	7	125	69/69	100	3e-27	696871576	696871644
sil_1006216	7	125	69/69	100	3e-27	696982011	696981943
sil_1024978	7	120	68/69	99	1e-25	698677704	698677636
sil_2250411	7	120	68/69	99	1e-25	698679109	698679041
SNP_1033622	7	125	69/69	100	3e-27	699150968	699151036	7	217.39
sil_1101705	7	125	69/69	100	3e-27	699866389	699866321
sil_3021973	7	125	69/69	100	3e-27	700108679	700108611
sil_1071793	7	125	69/69	100	3e-27	700601339	700601271
sil_5010619	7	120	68/69	99	1e-25	700679602	700679670
SNP_1027229	7	120	68/69	99	1e-25	700849927	700849995
SNP_996662	7	123	68/68	100	1e-26	702999154	702999221
sil_1127071	7	120	68/69	99	1e-25	706013505	706013573
sil_5007083	7	116	67/69	97	1e-24	706322799	706322731
SNP_100003820	7	116	68/69	99	1e-24	706481367	706481300
sil_1044837	7	120	68/69	99	1e-25	706986685	706986753
sil_1703590	7	125	69/69	100	3e-27	707806994	707806926
sil_4999357	7	116	67/69	97	1e-24	708104435	708104367
sil_1218066	7	123	68/68	100	1e-26	708347181	708347248
sil_1765140	7	114	66/68	97	5e-24	708598073	708598006
sil_5006117	7	116	67/69	97	1e-24	708655959	708656027
SNP_1084130	7	125	69/69	100	3e-27	709845432	709845500
[truncated: 48 more rows]
